# Supplementary figures and images for: Determination of cesium using nickel hexacyanoferrate by stripping voltammetry
Source: Royal Society of Chemistry journal article supplement (doi:10.1039/d4an00469h), 2024-01-01

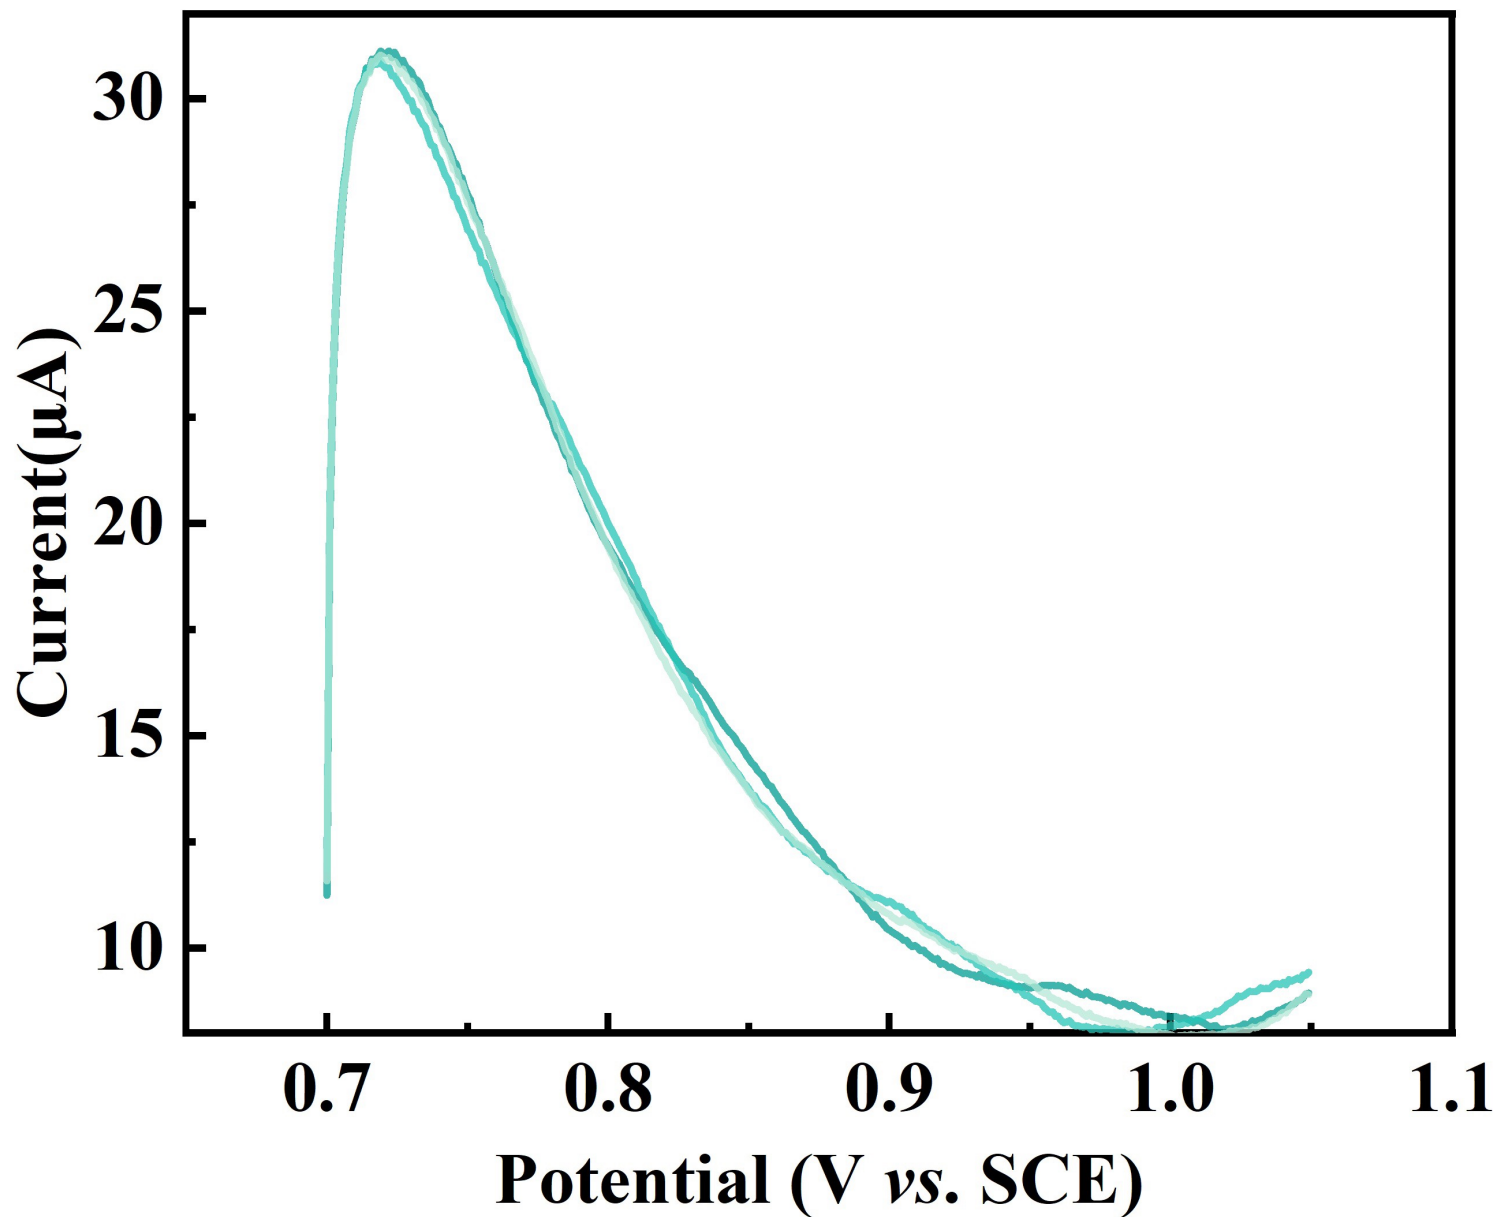

Supplement: d4an00469h1.pdf [file d4an00469h1.pdf]

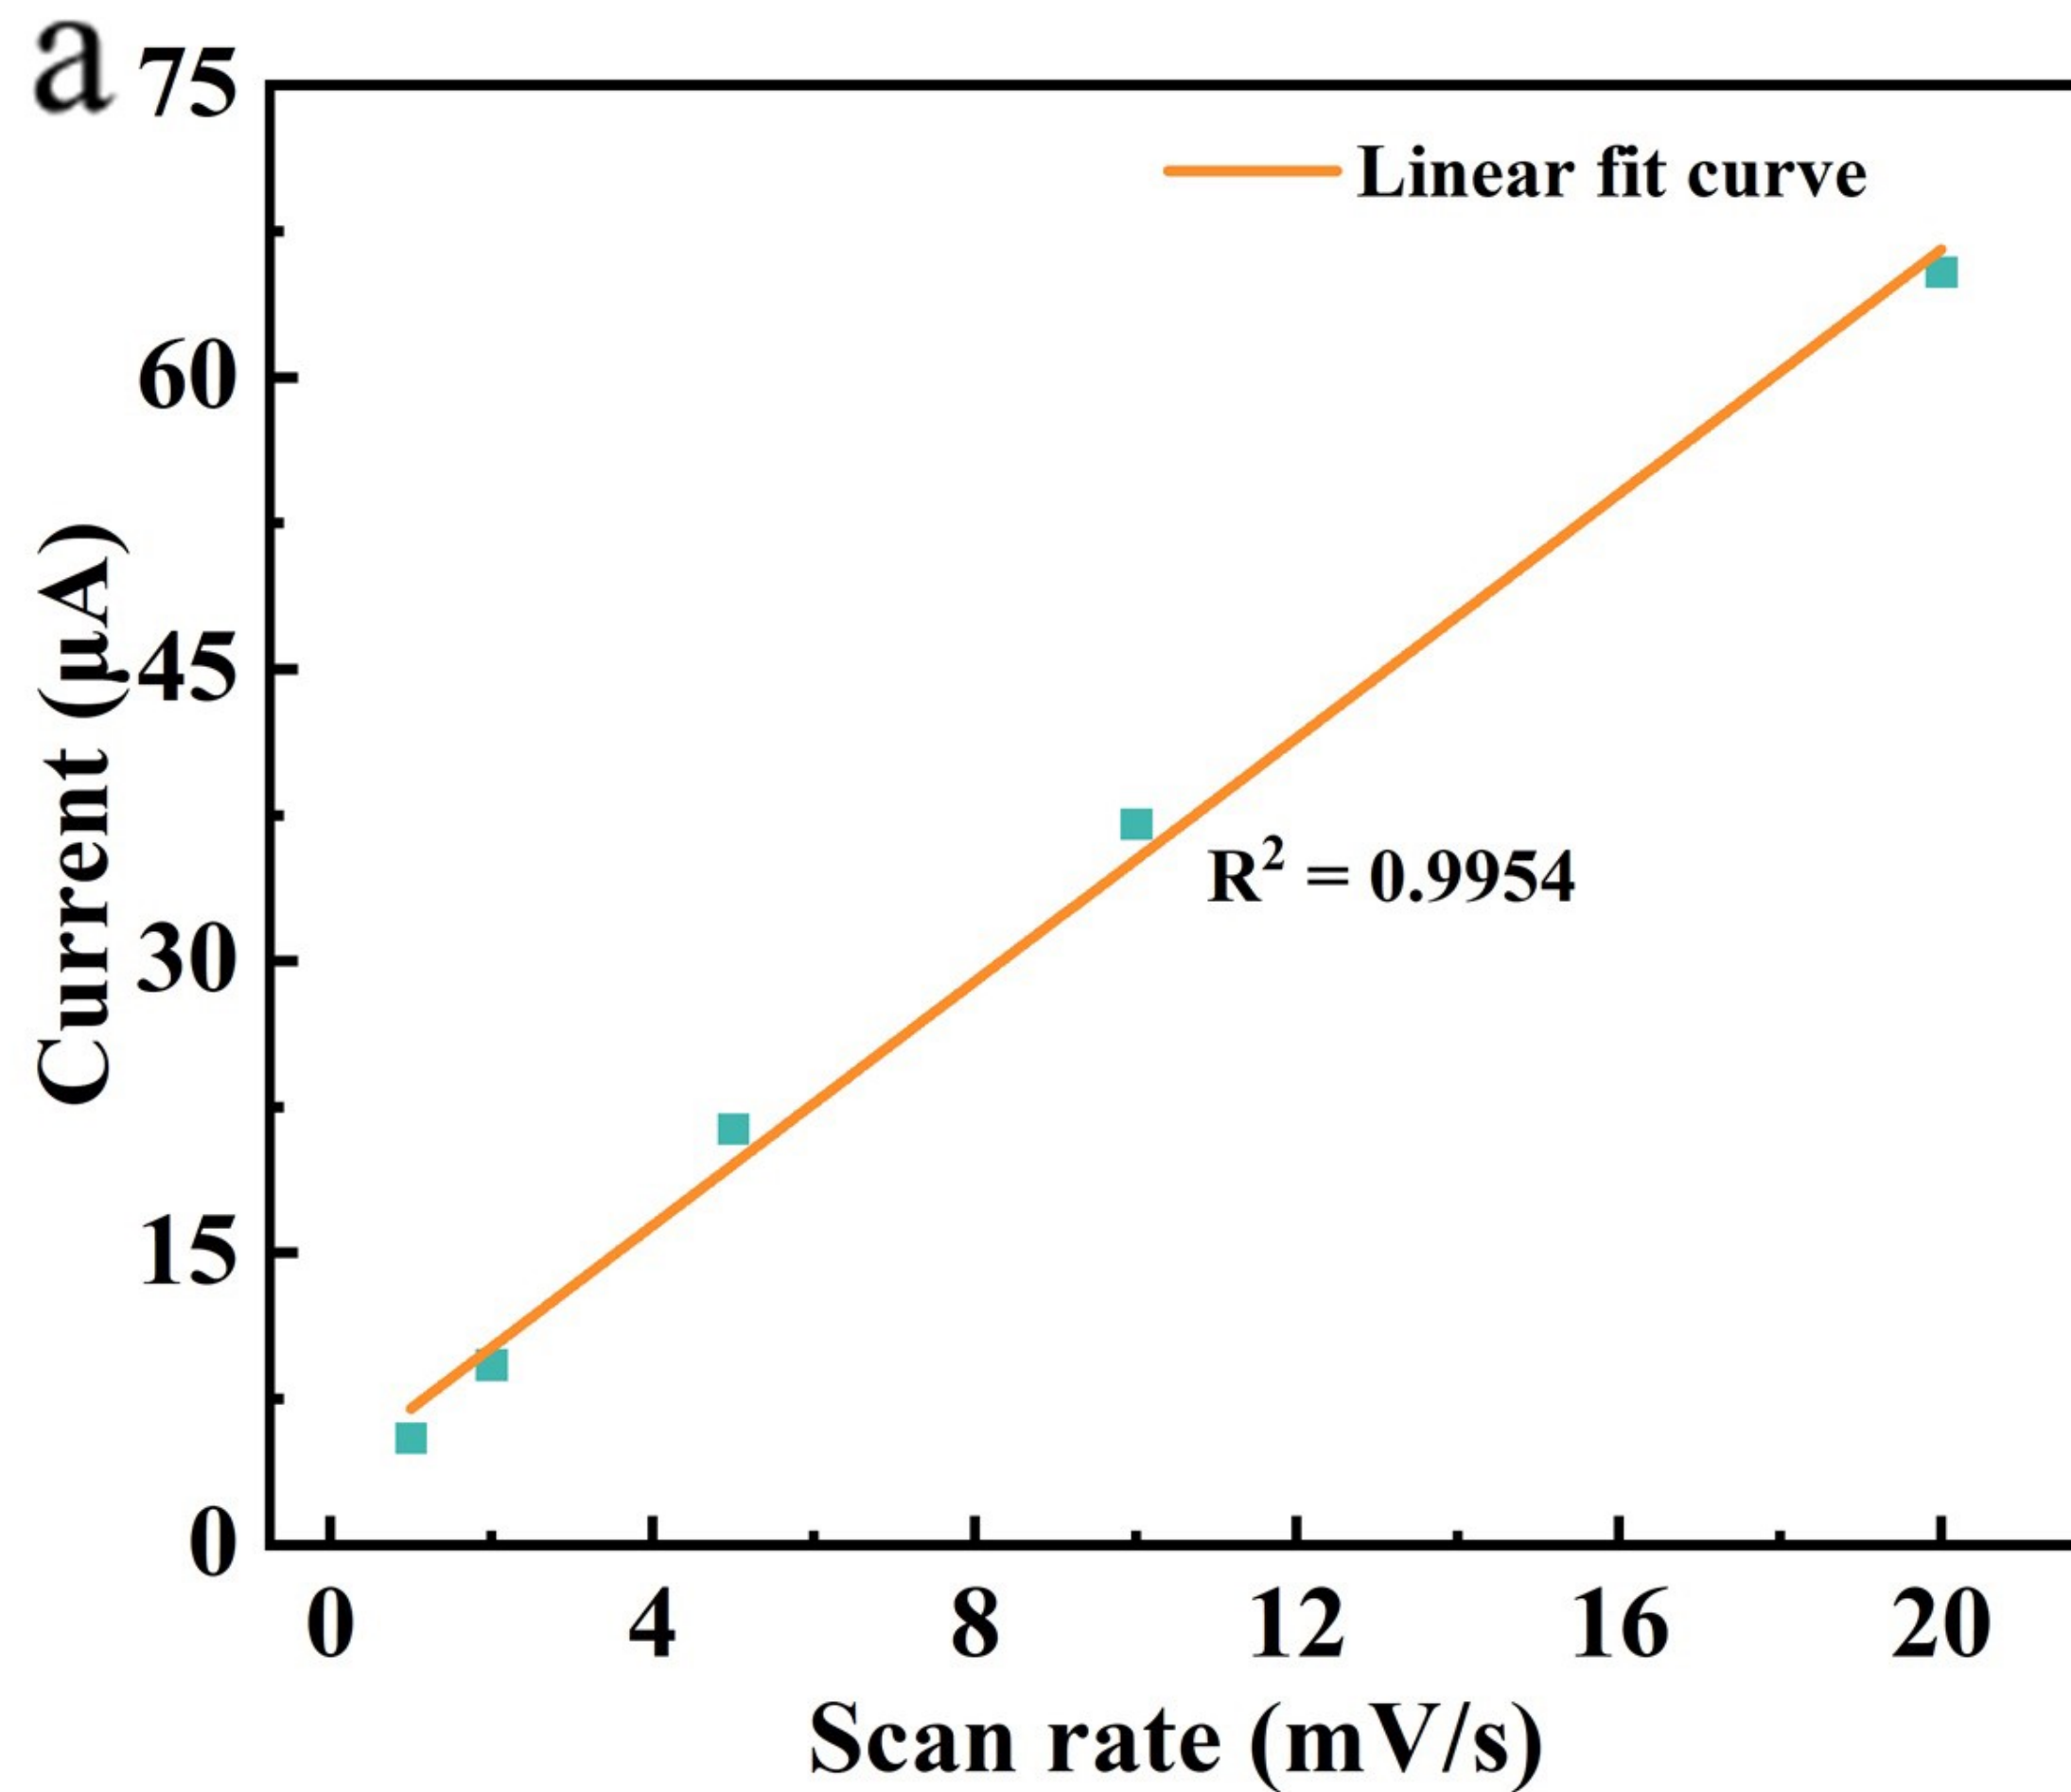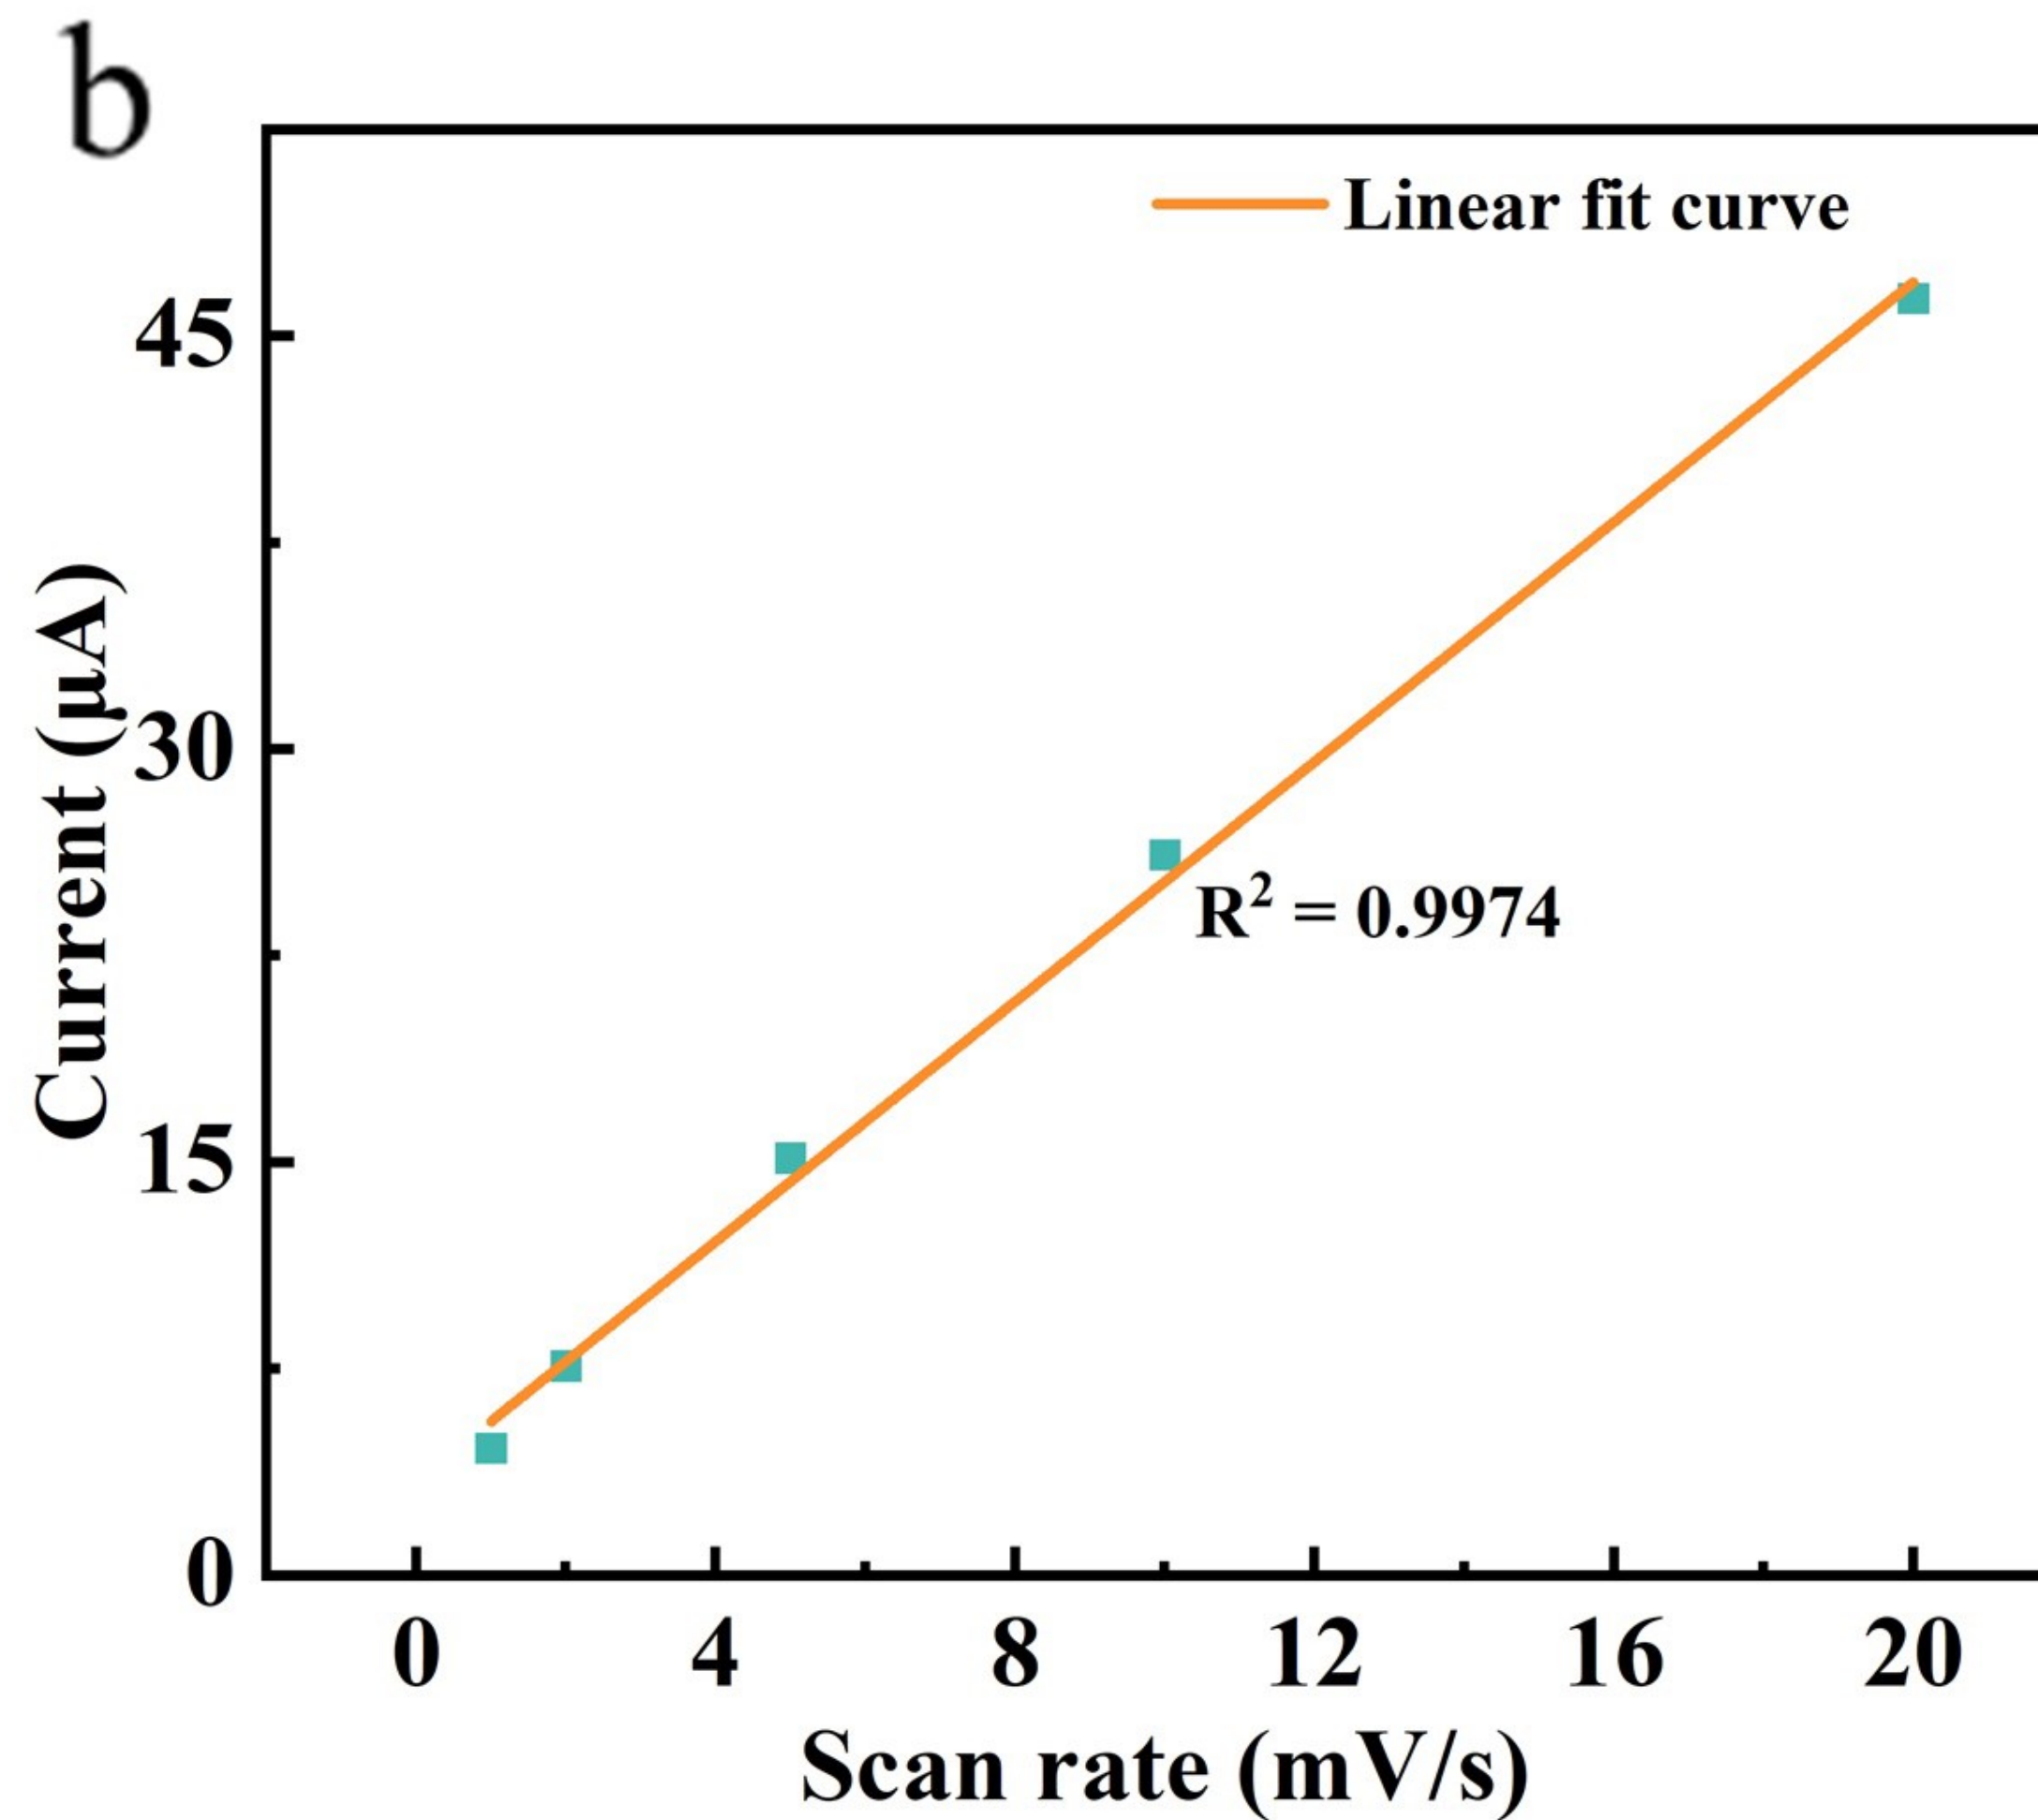

Supplement: d4an00469h2.pdf [file d4an00469h2.pdf]

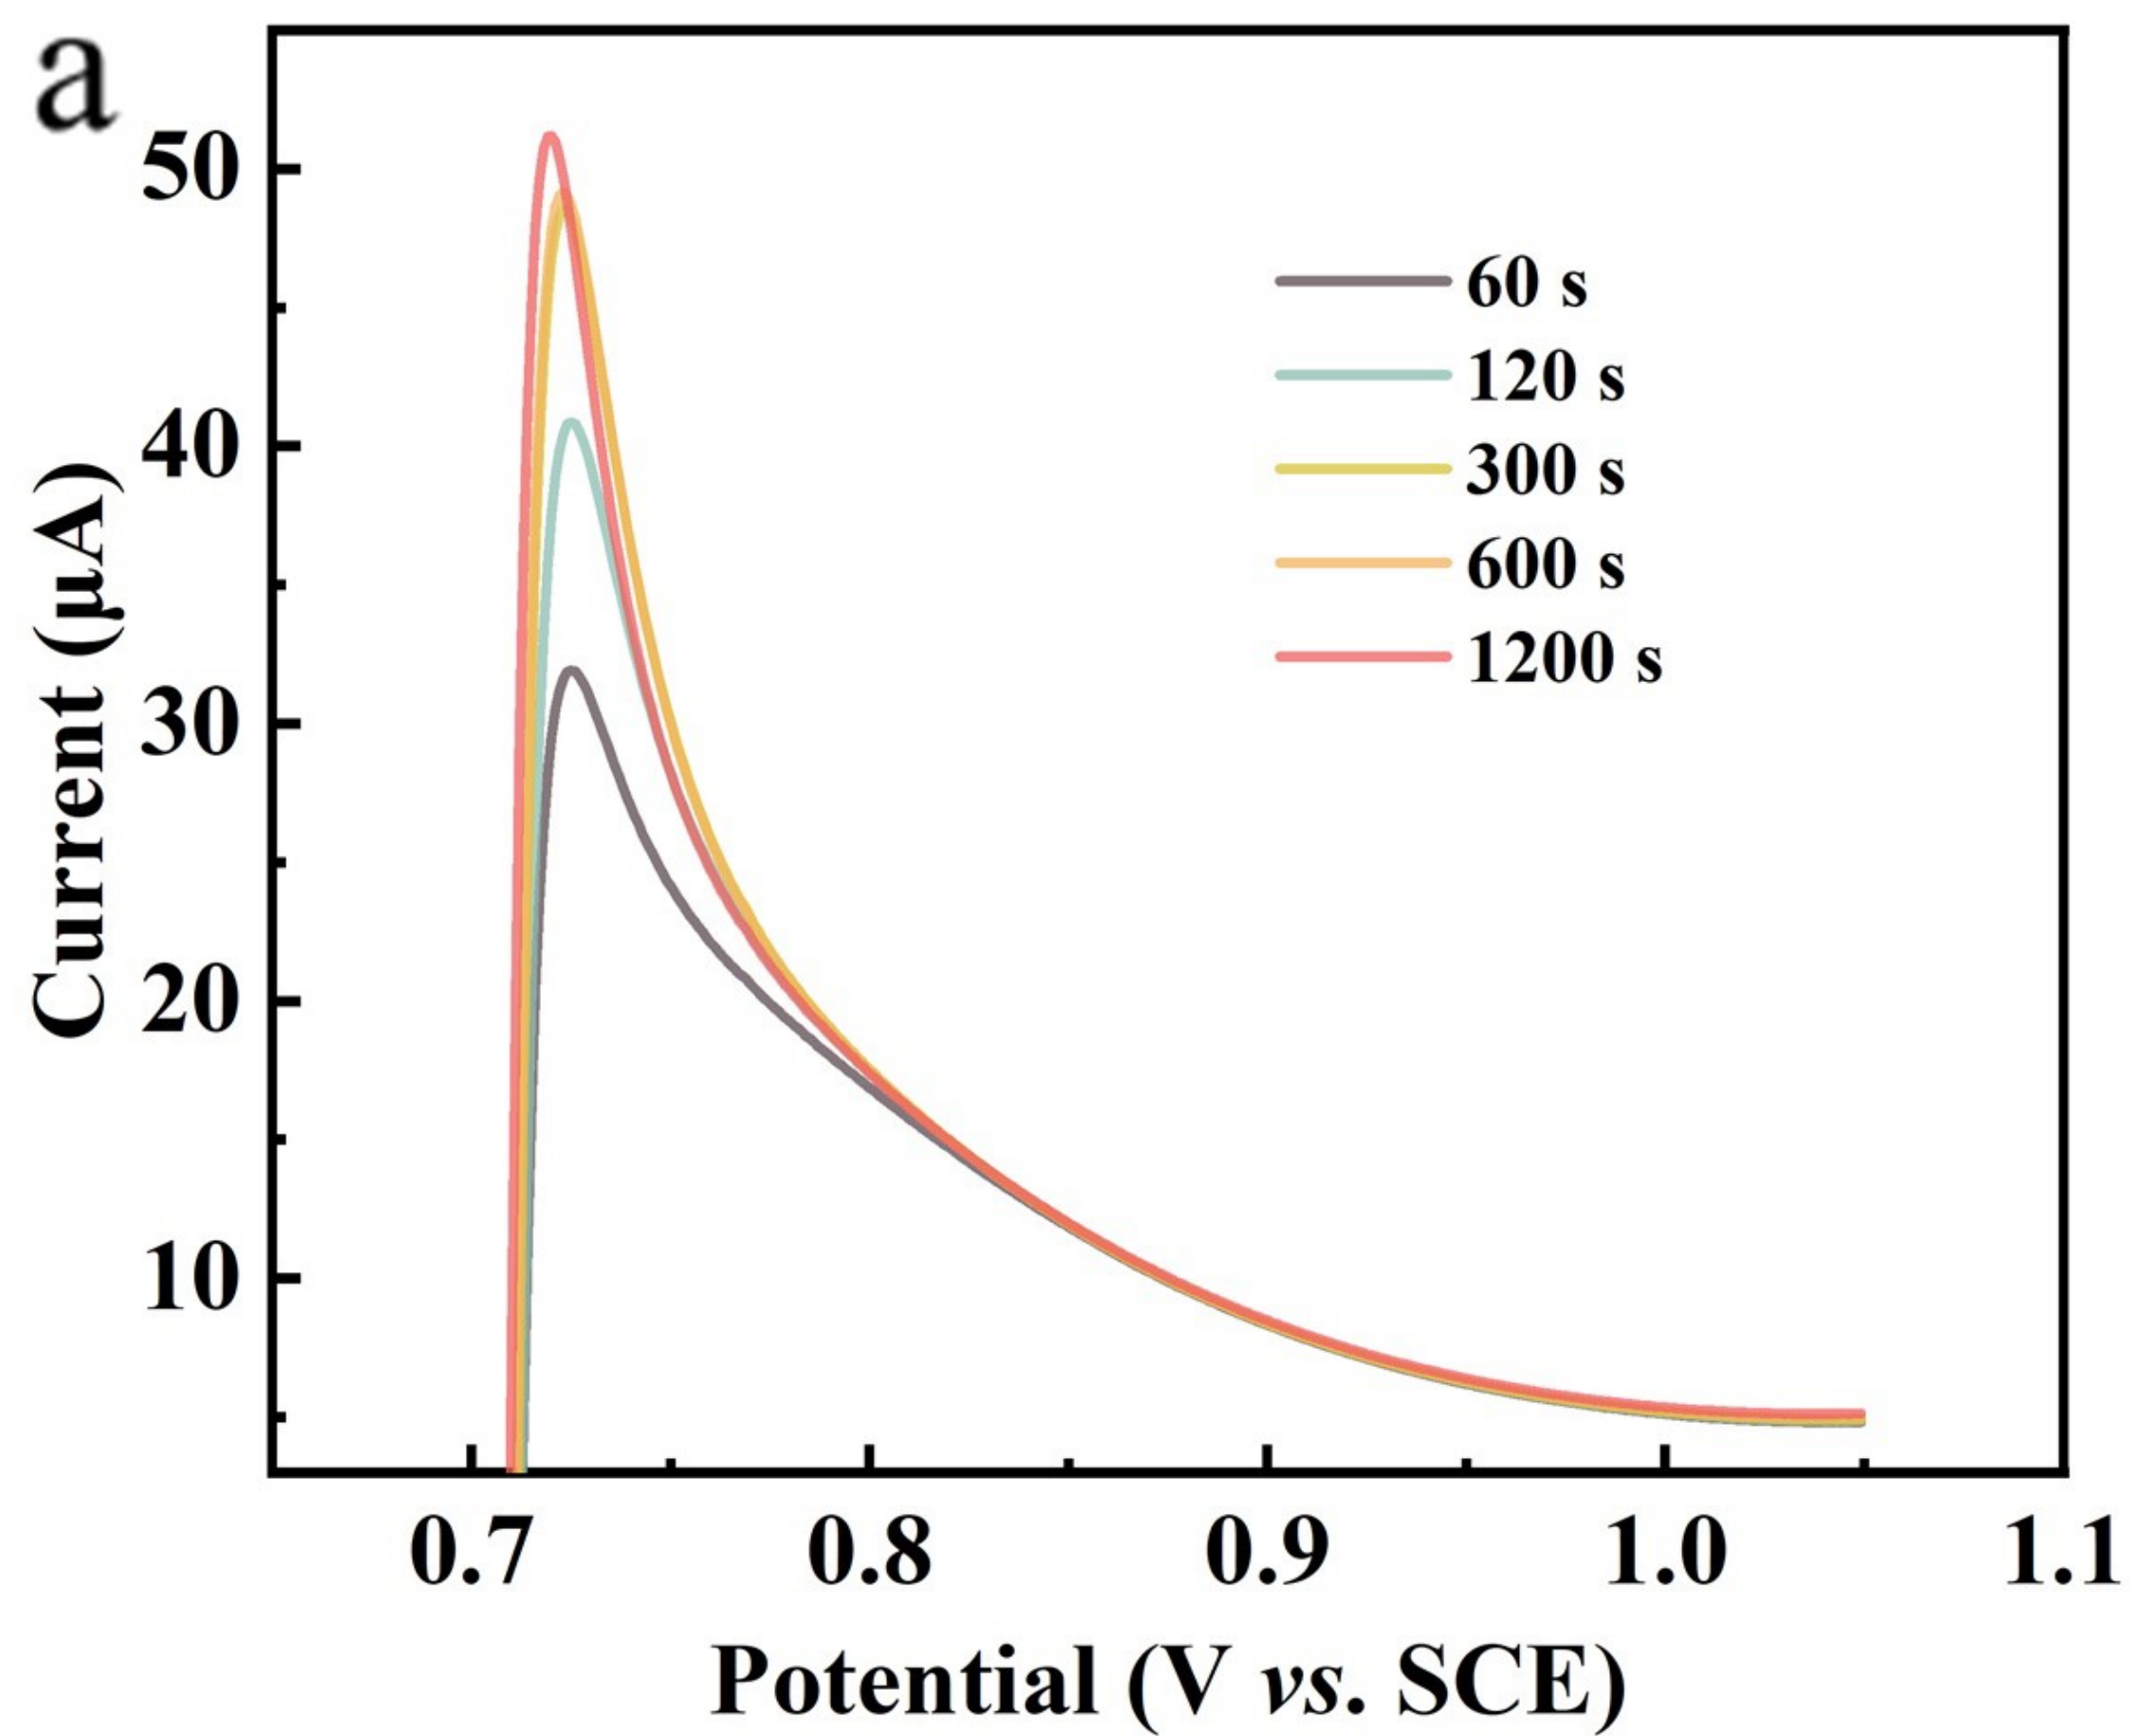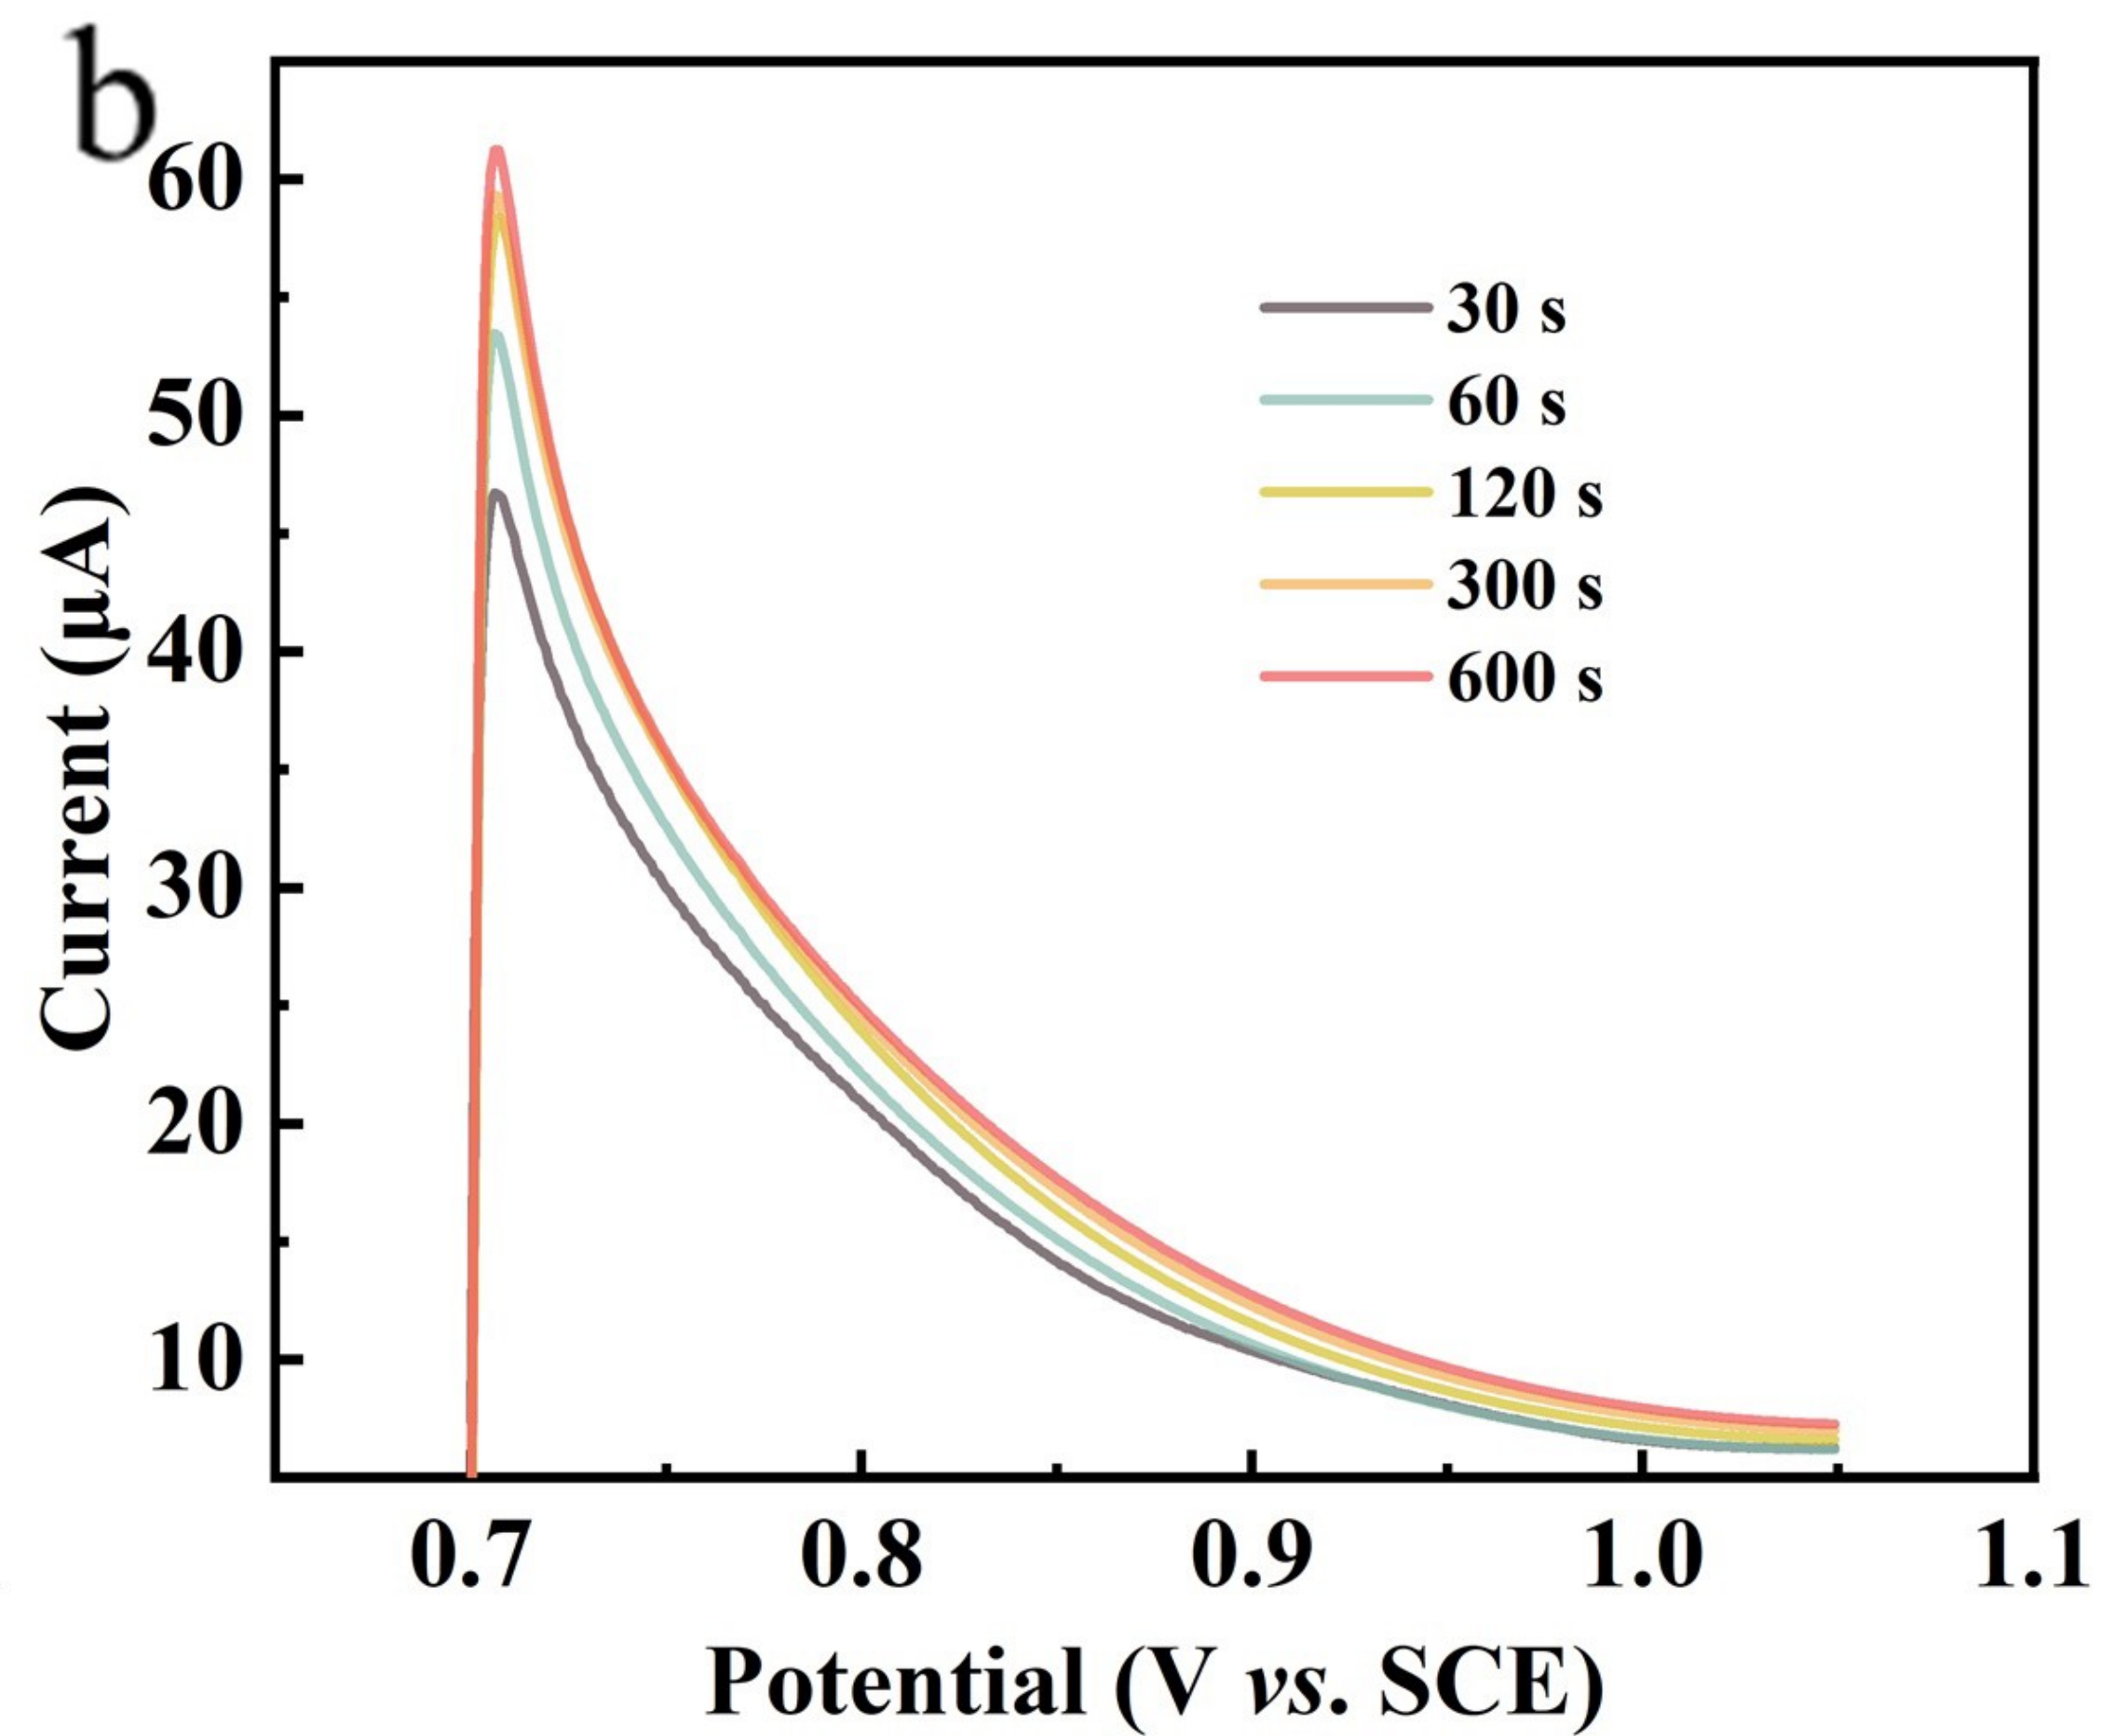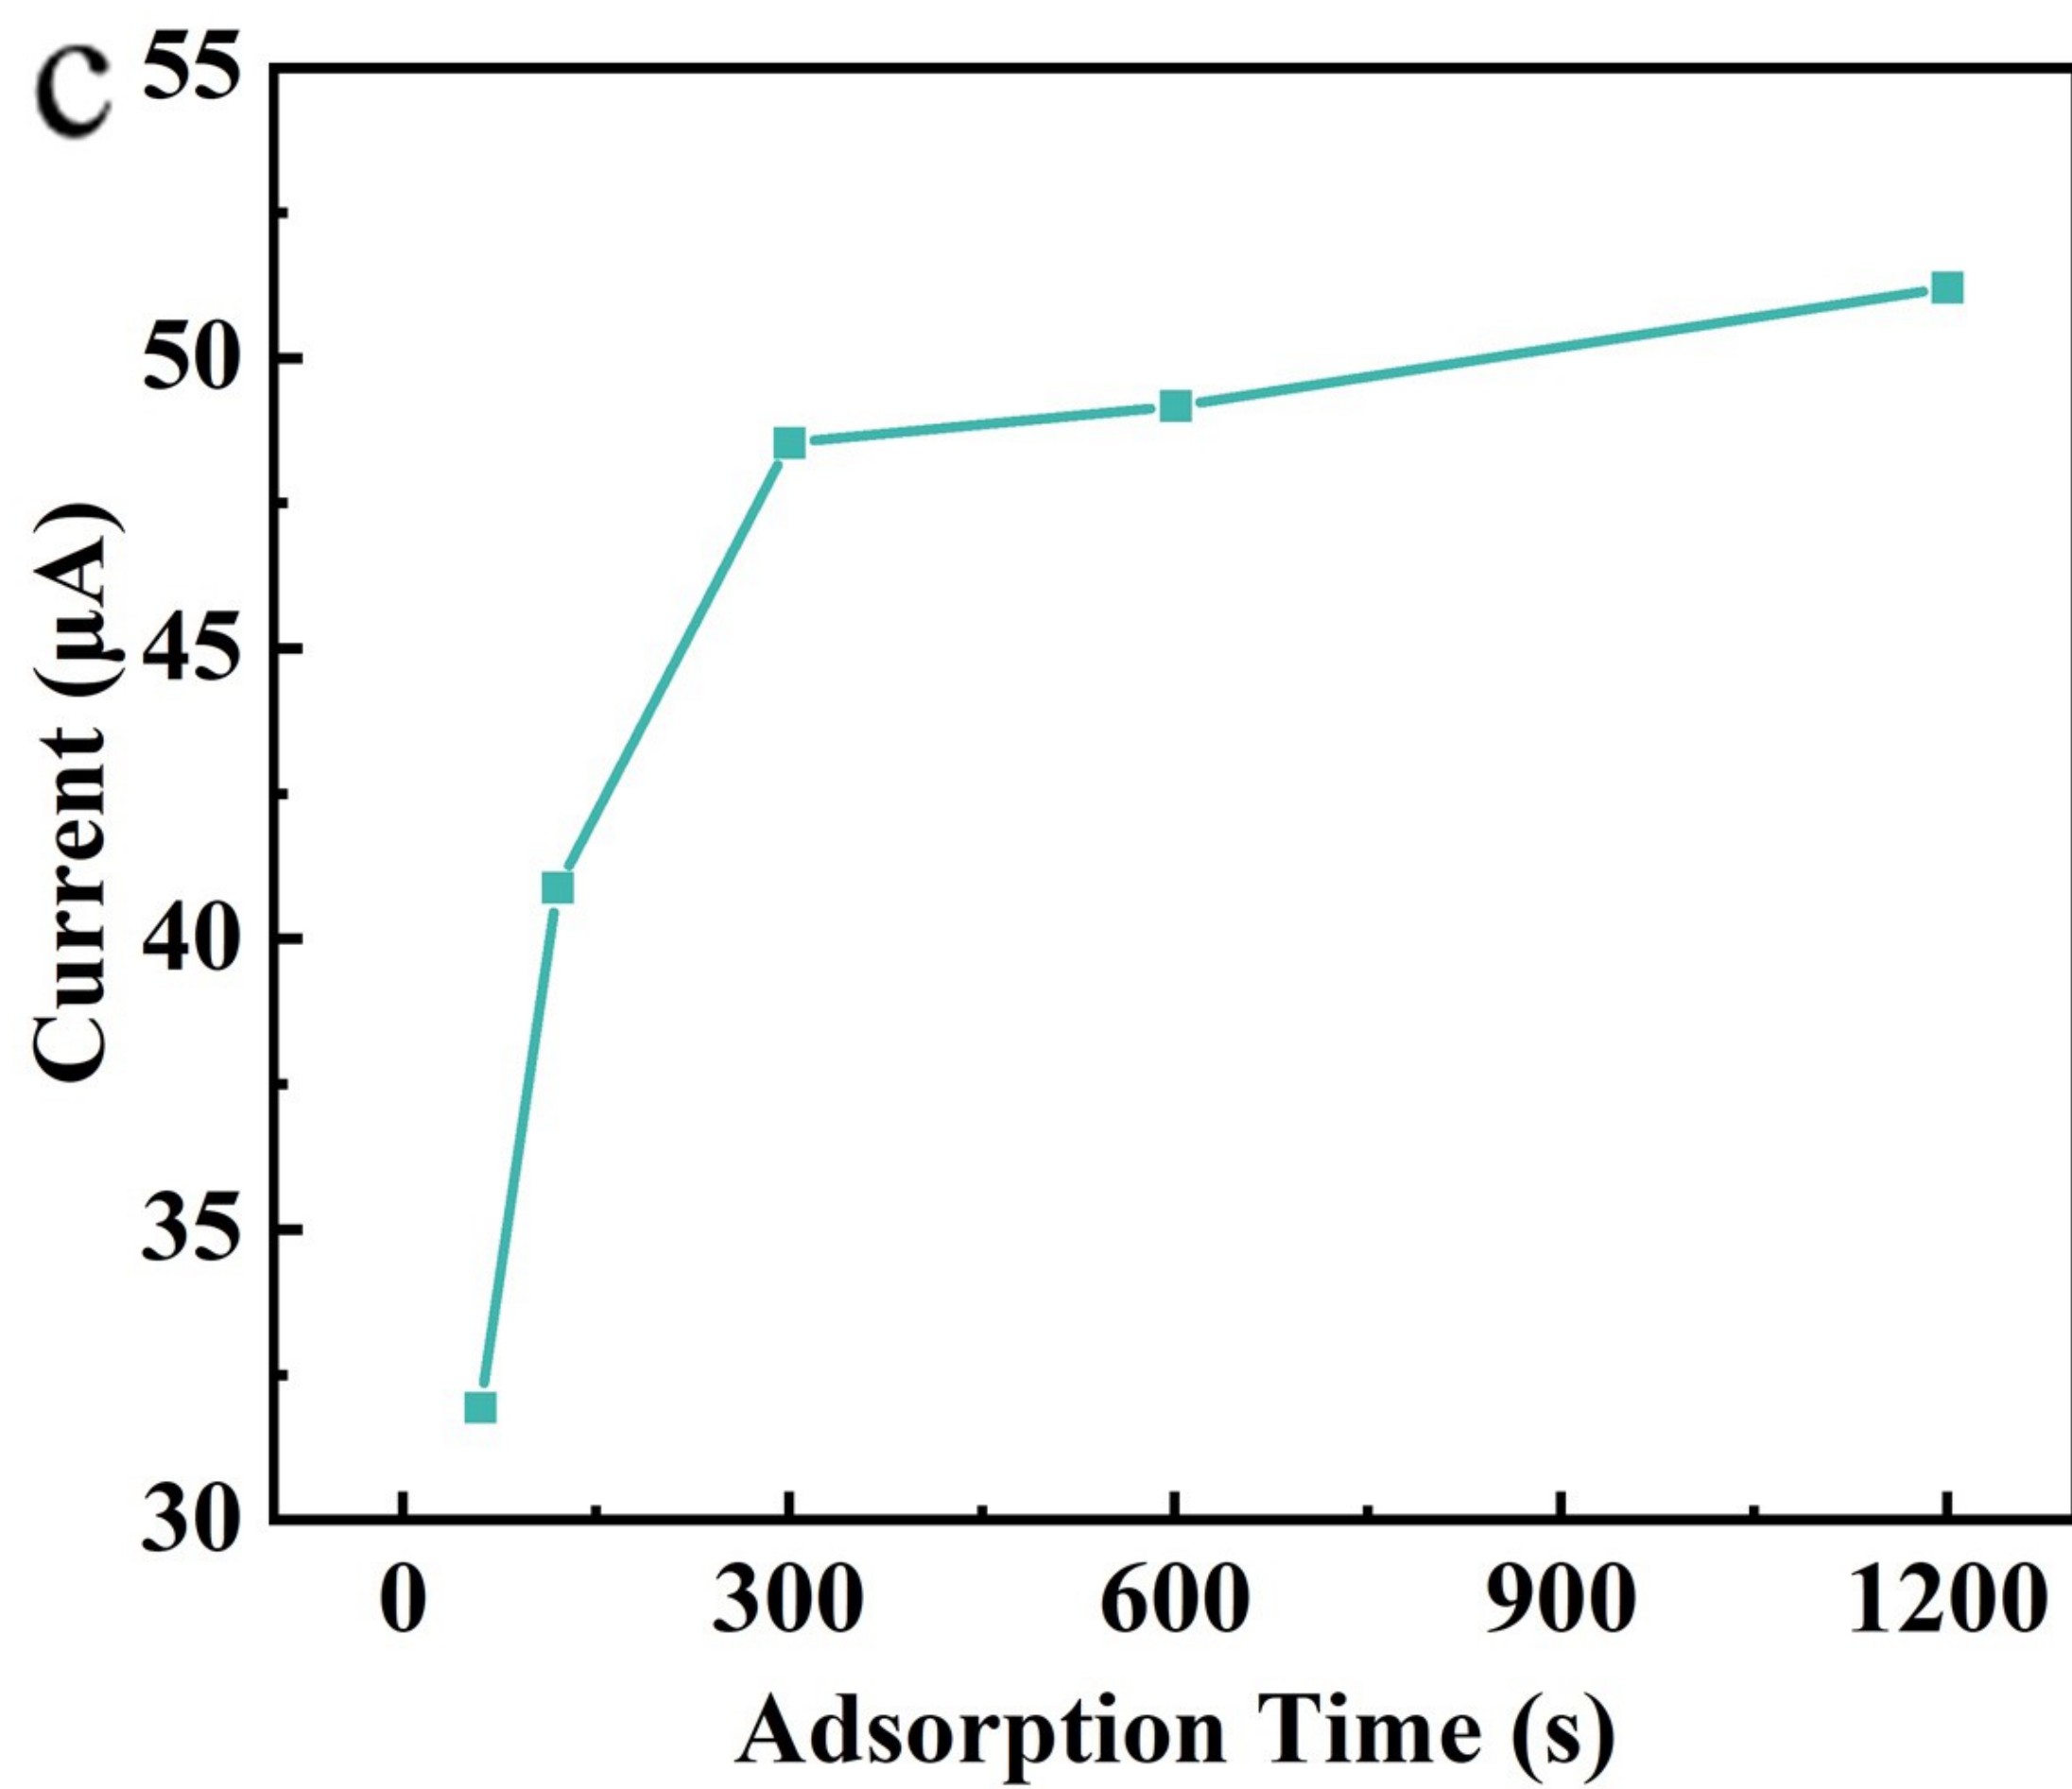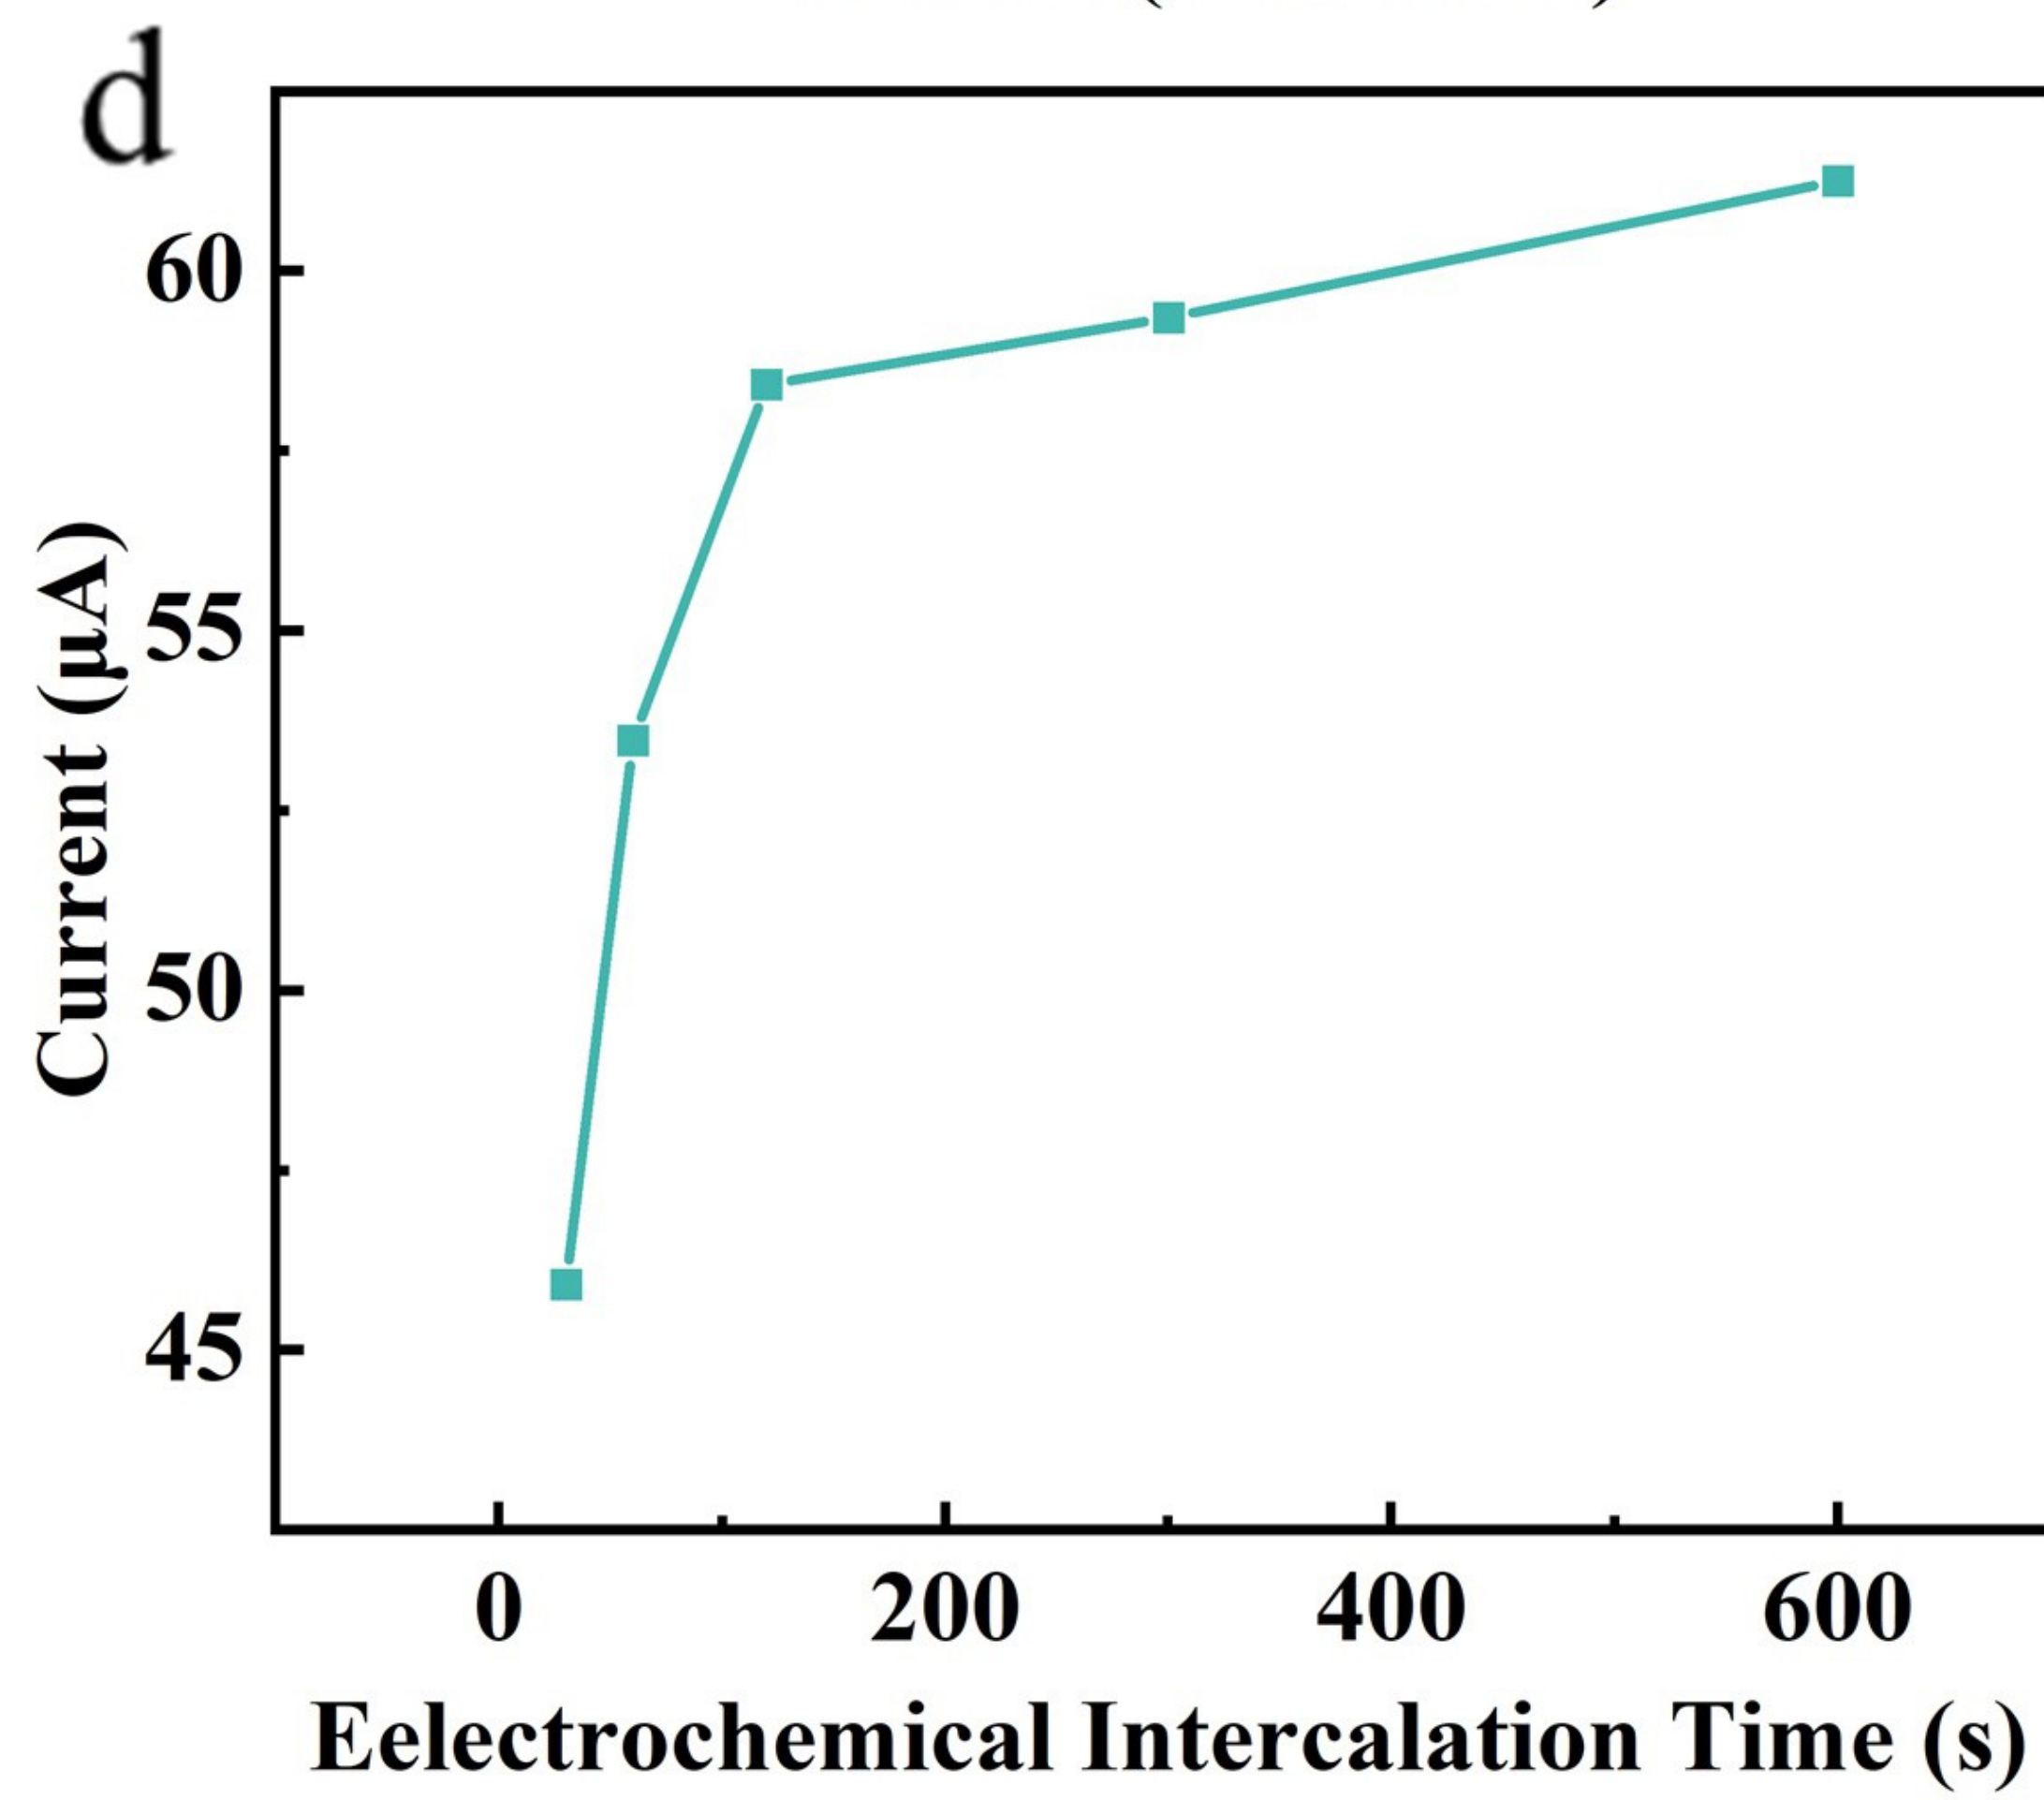

Supplement: d4an00469h3.pdf [file d4an00469h3.pdf]

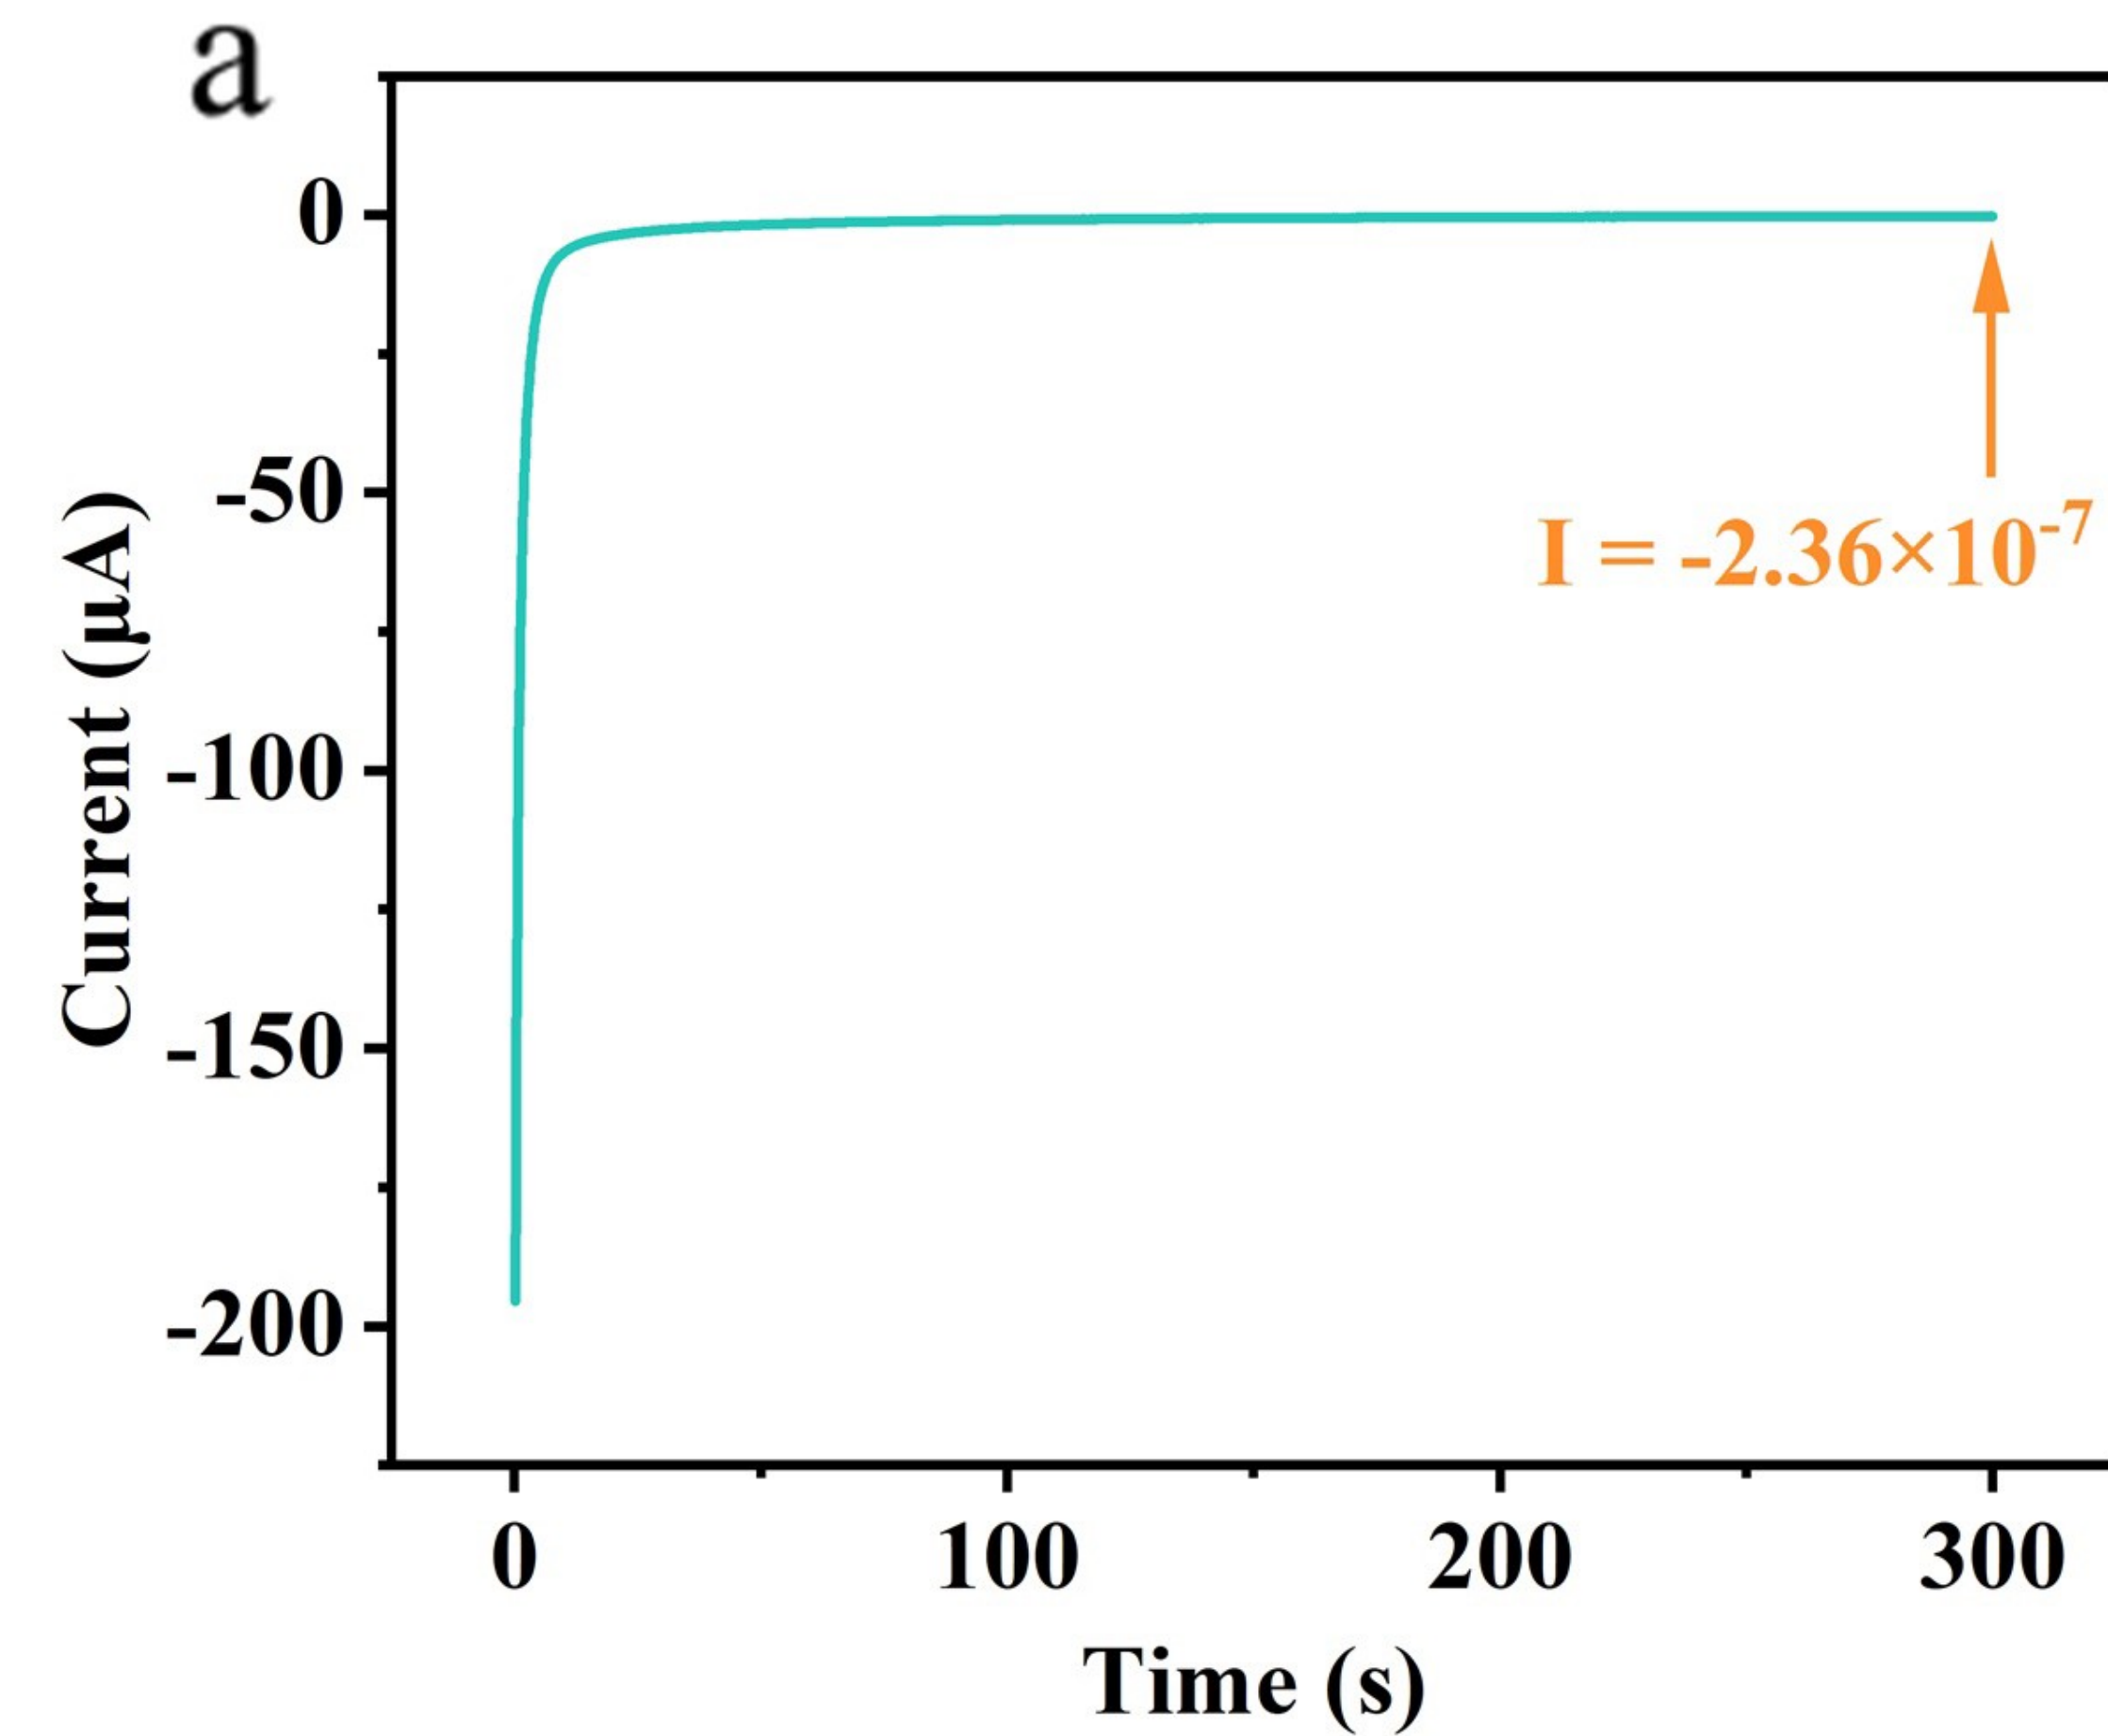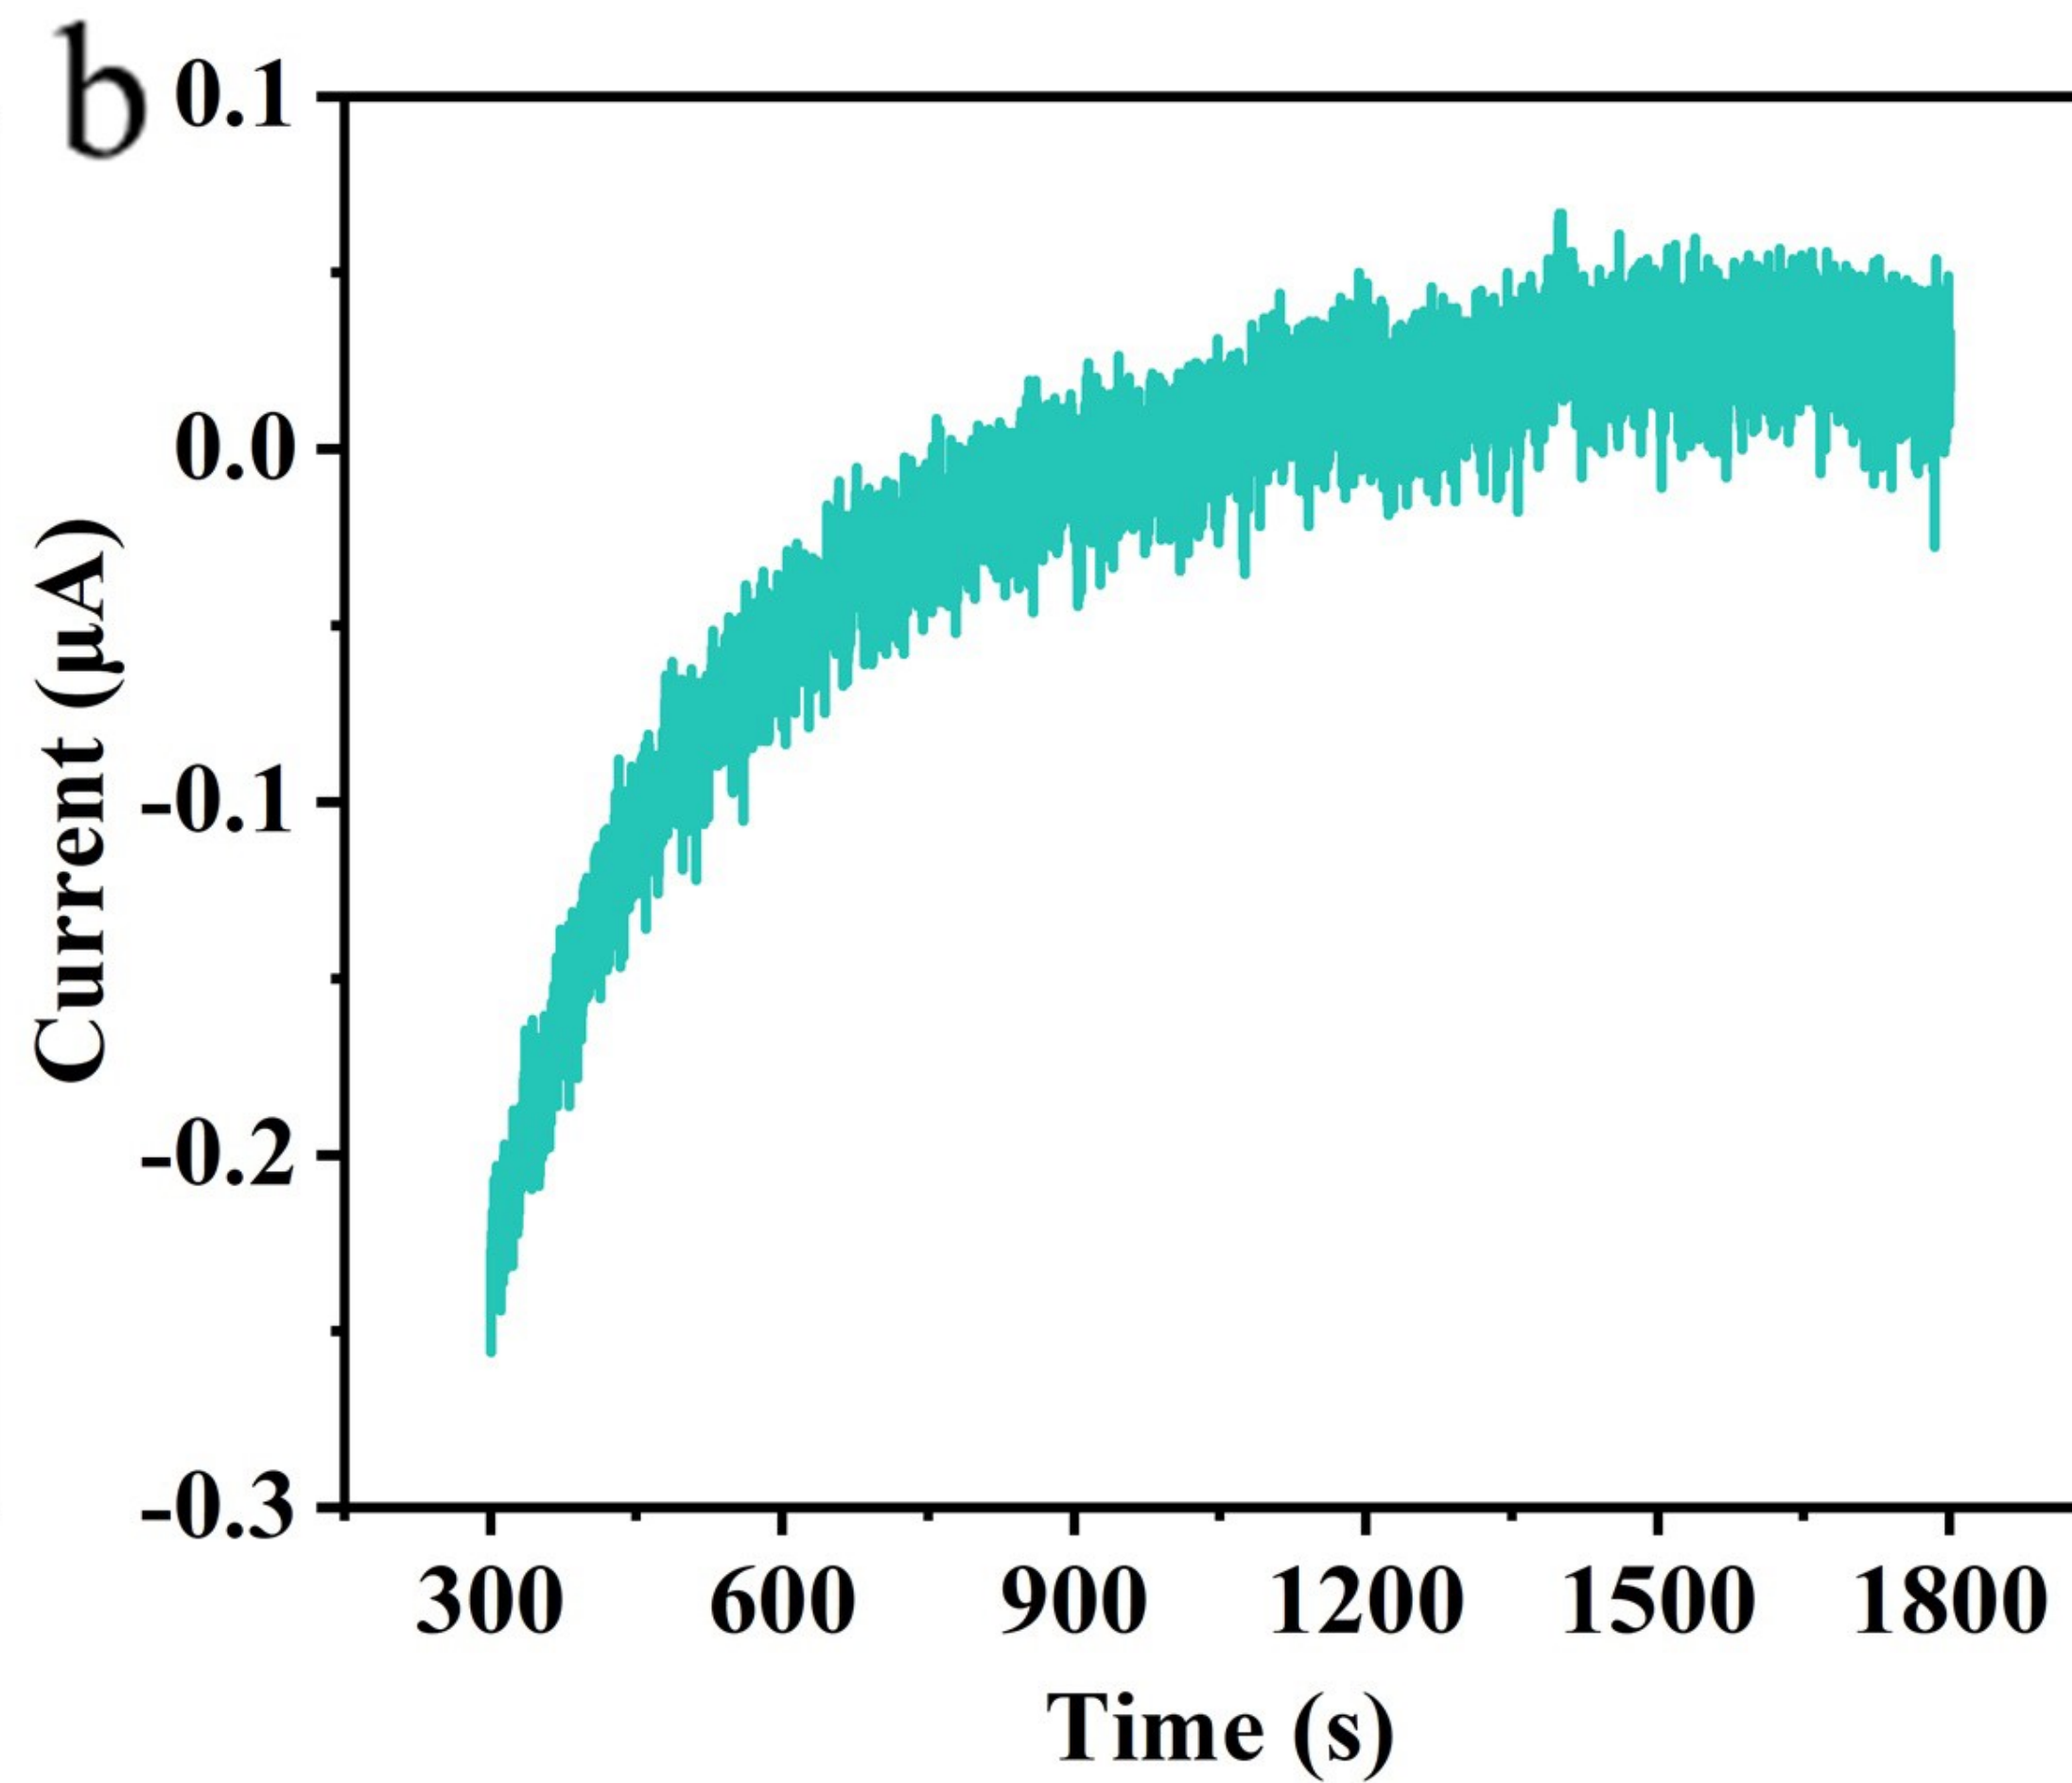

Supplement: d4an00469h4.pdf [file d4an00469h4.pdf]

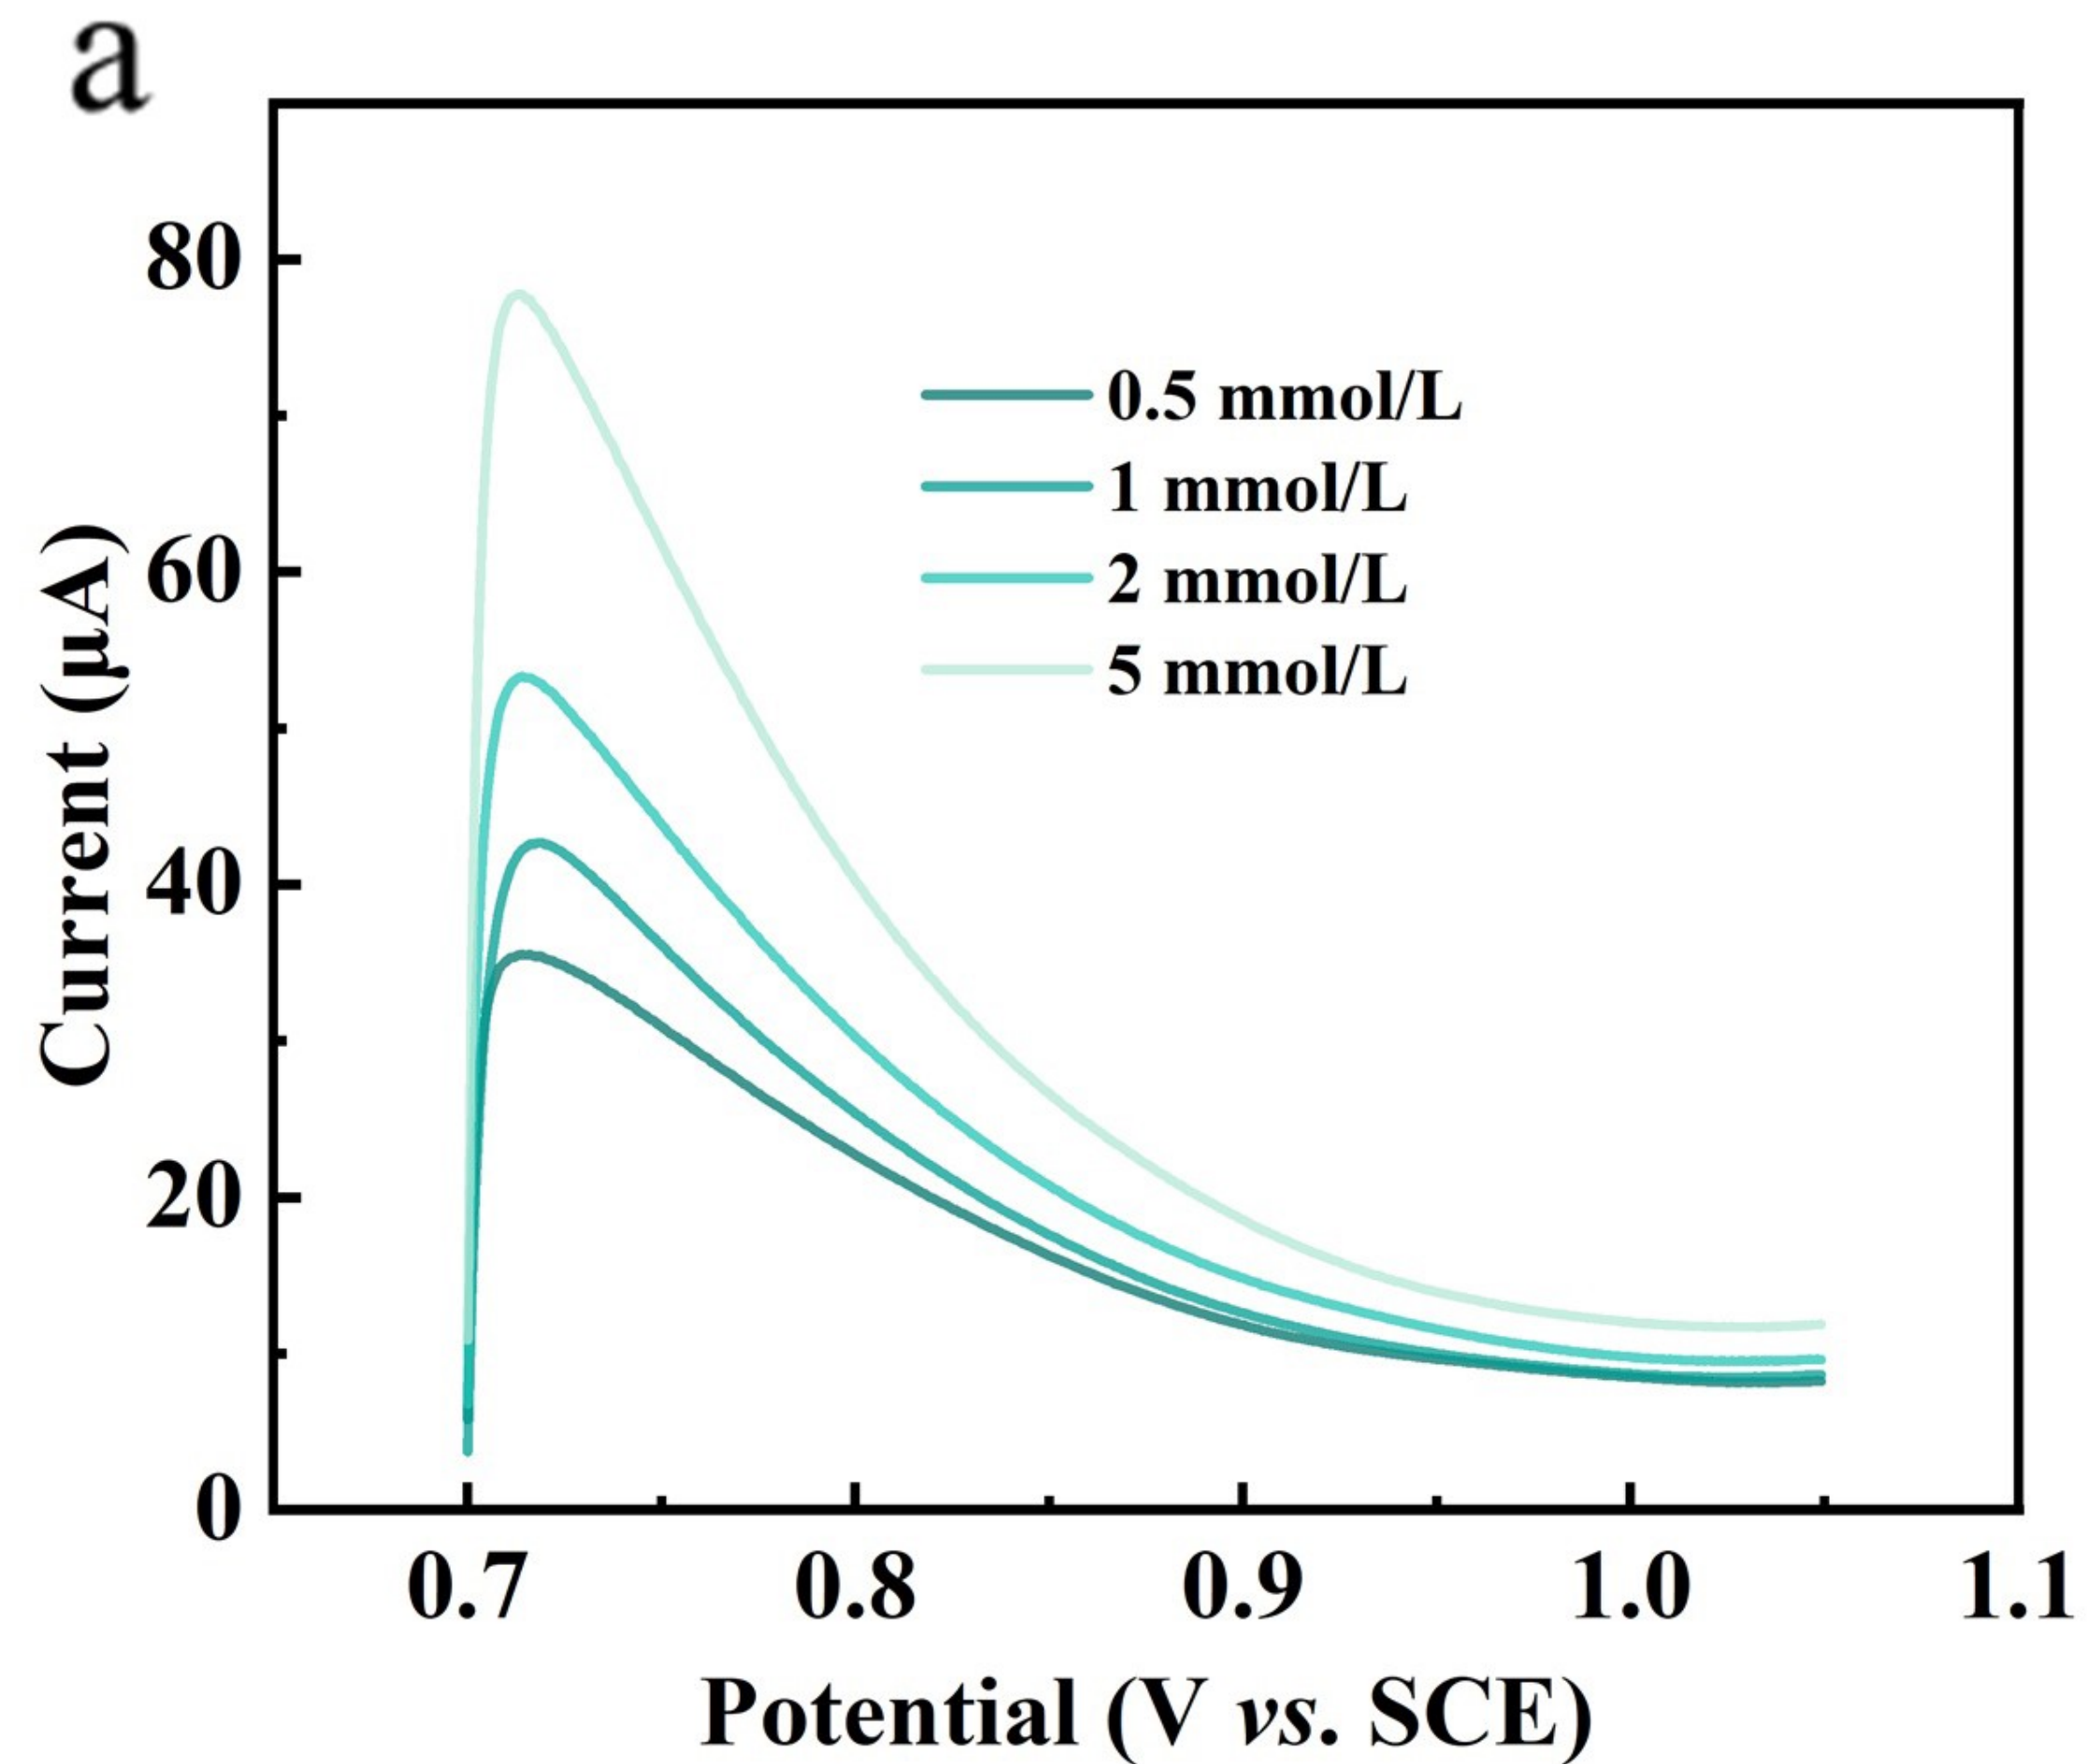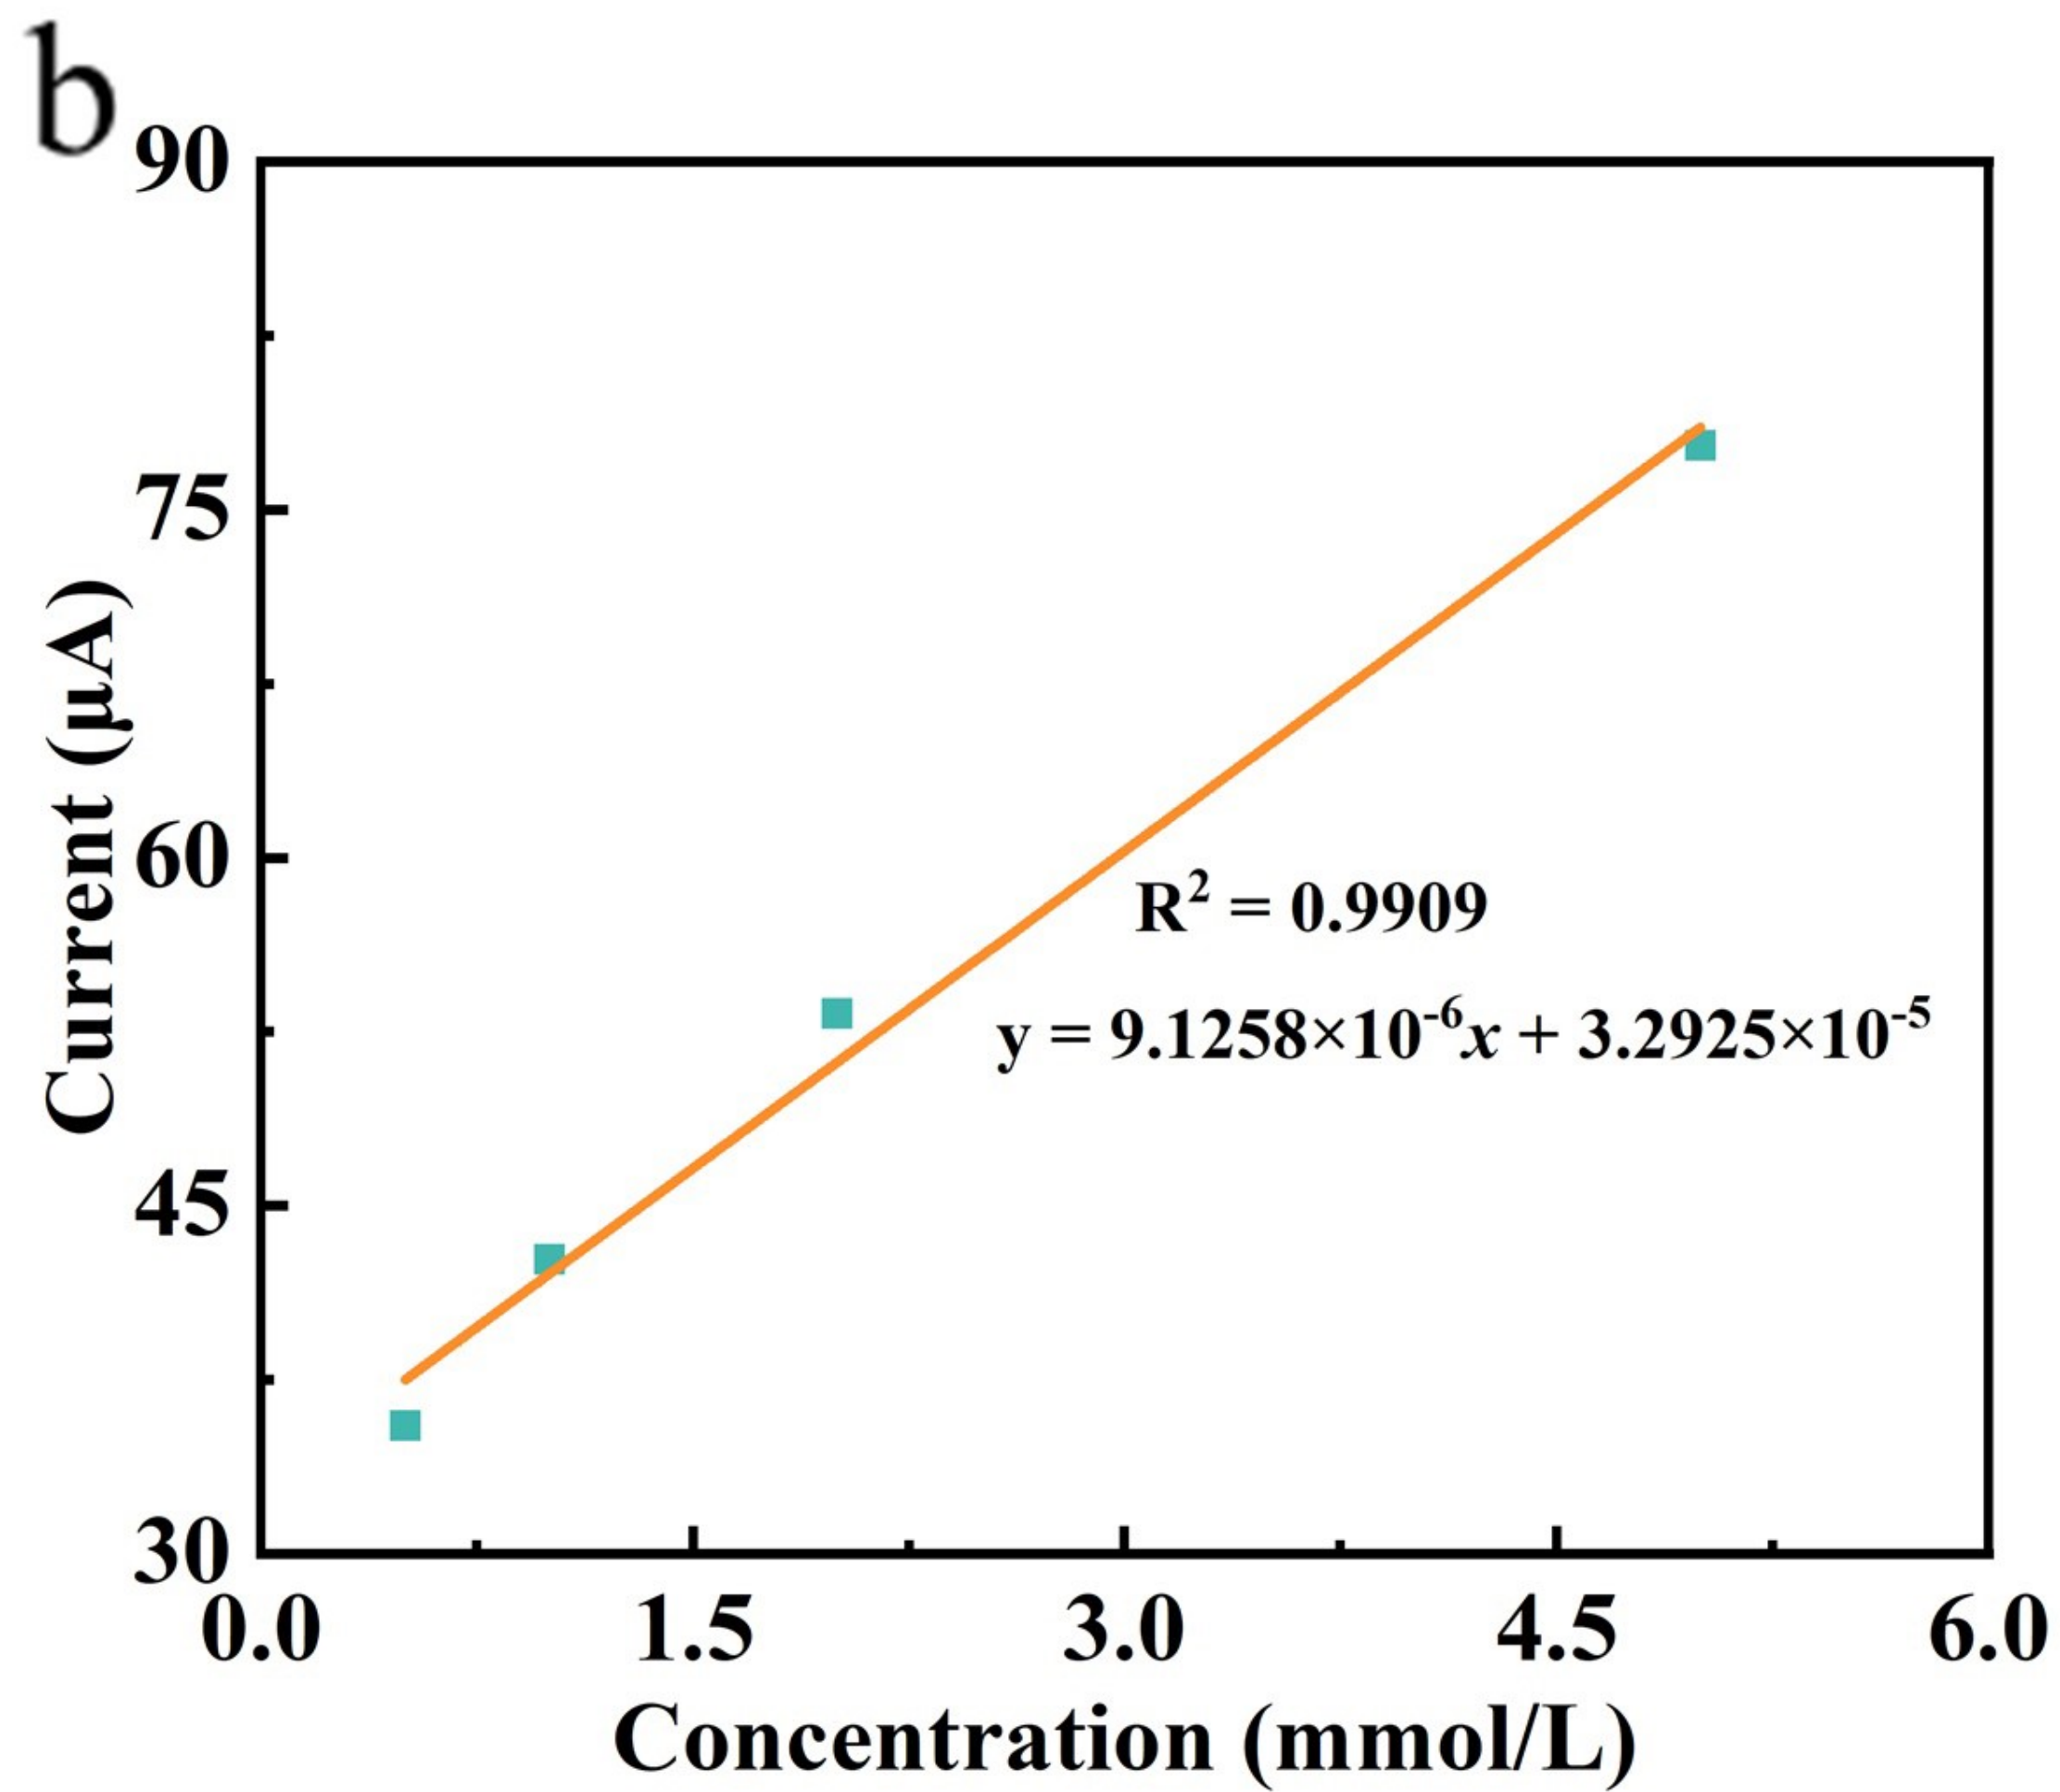

Supplement: d4an00469h5.pdf [file d4an00469h5.pdf]

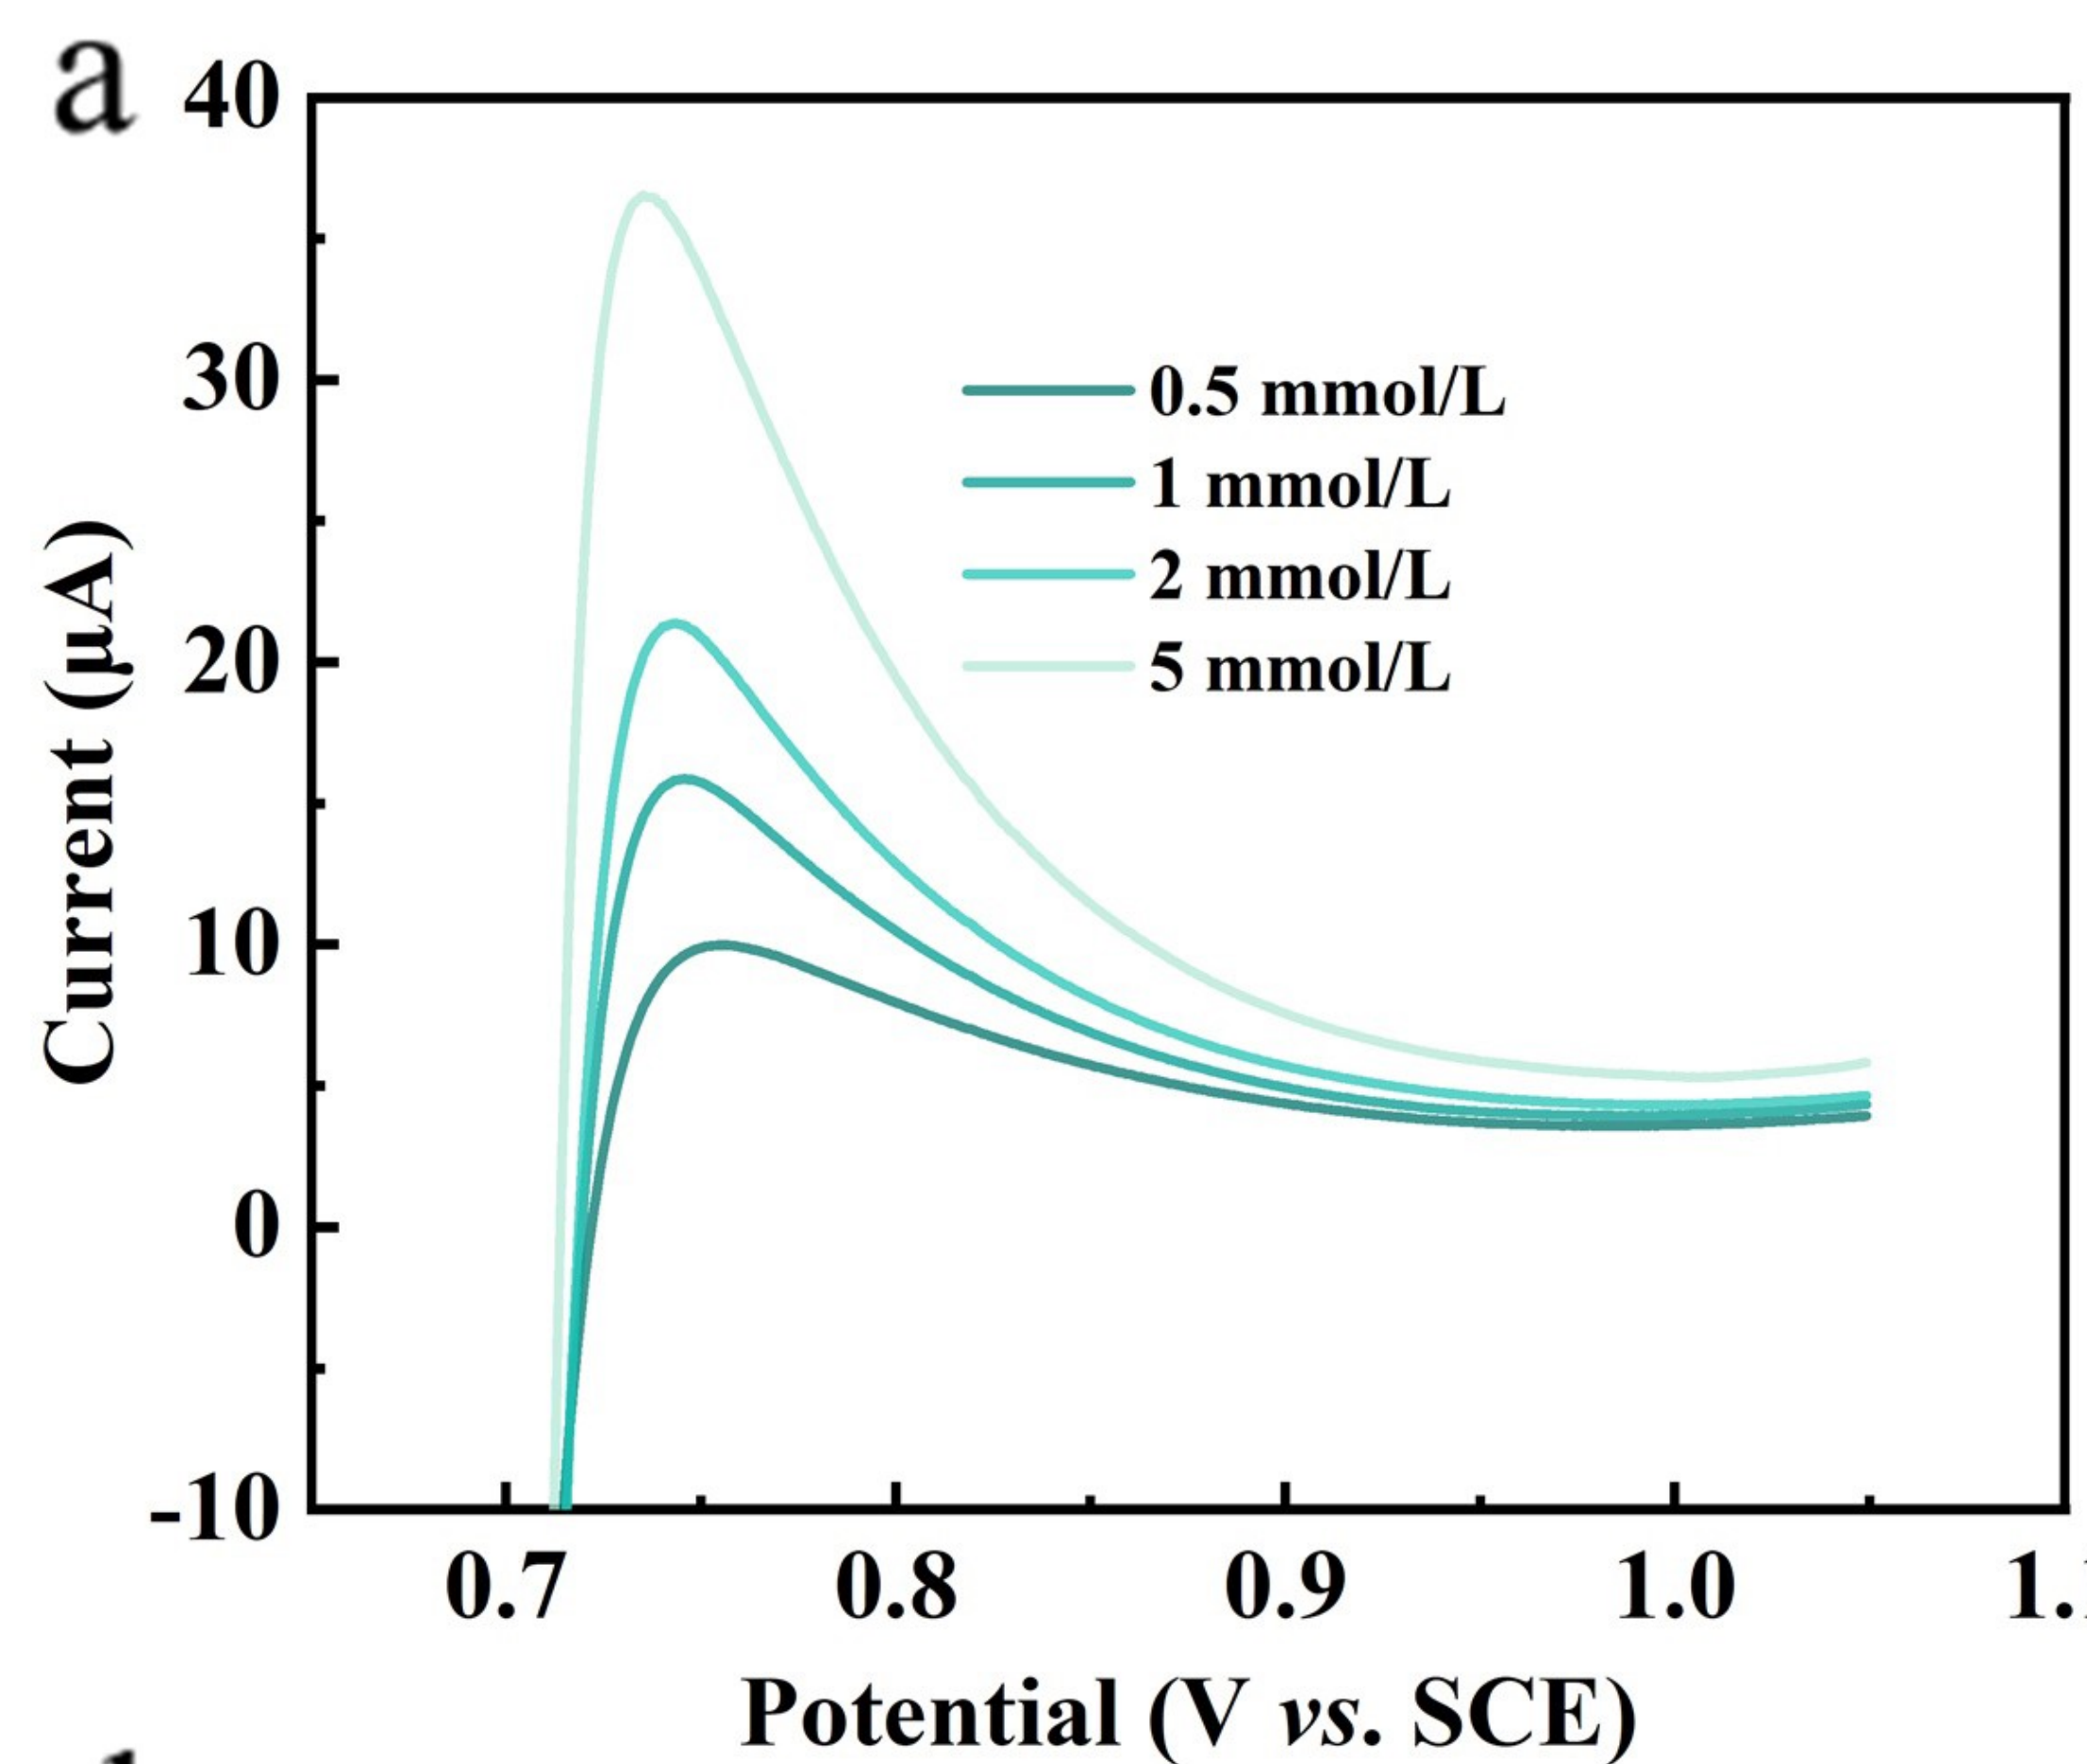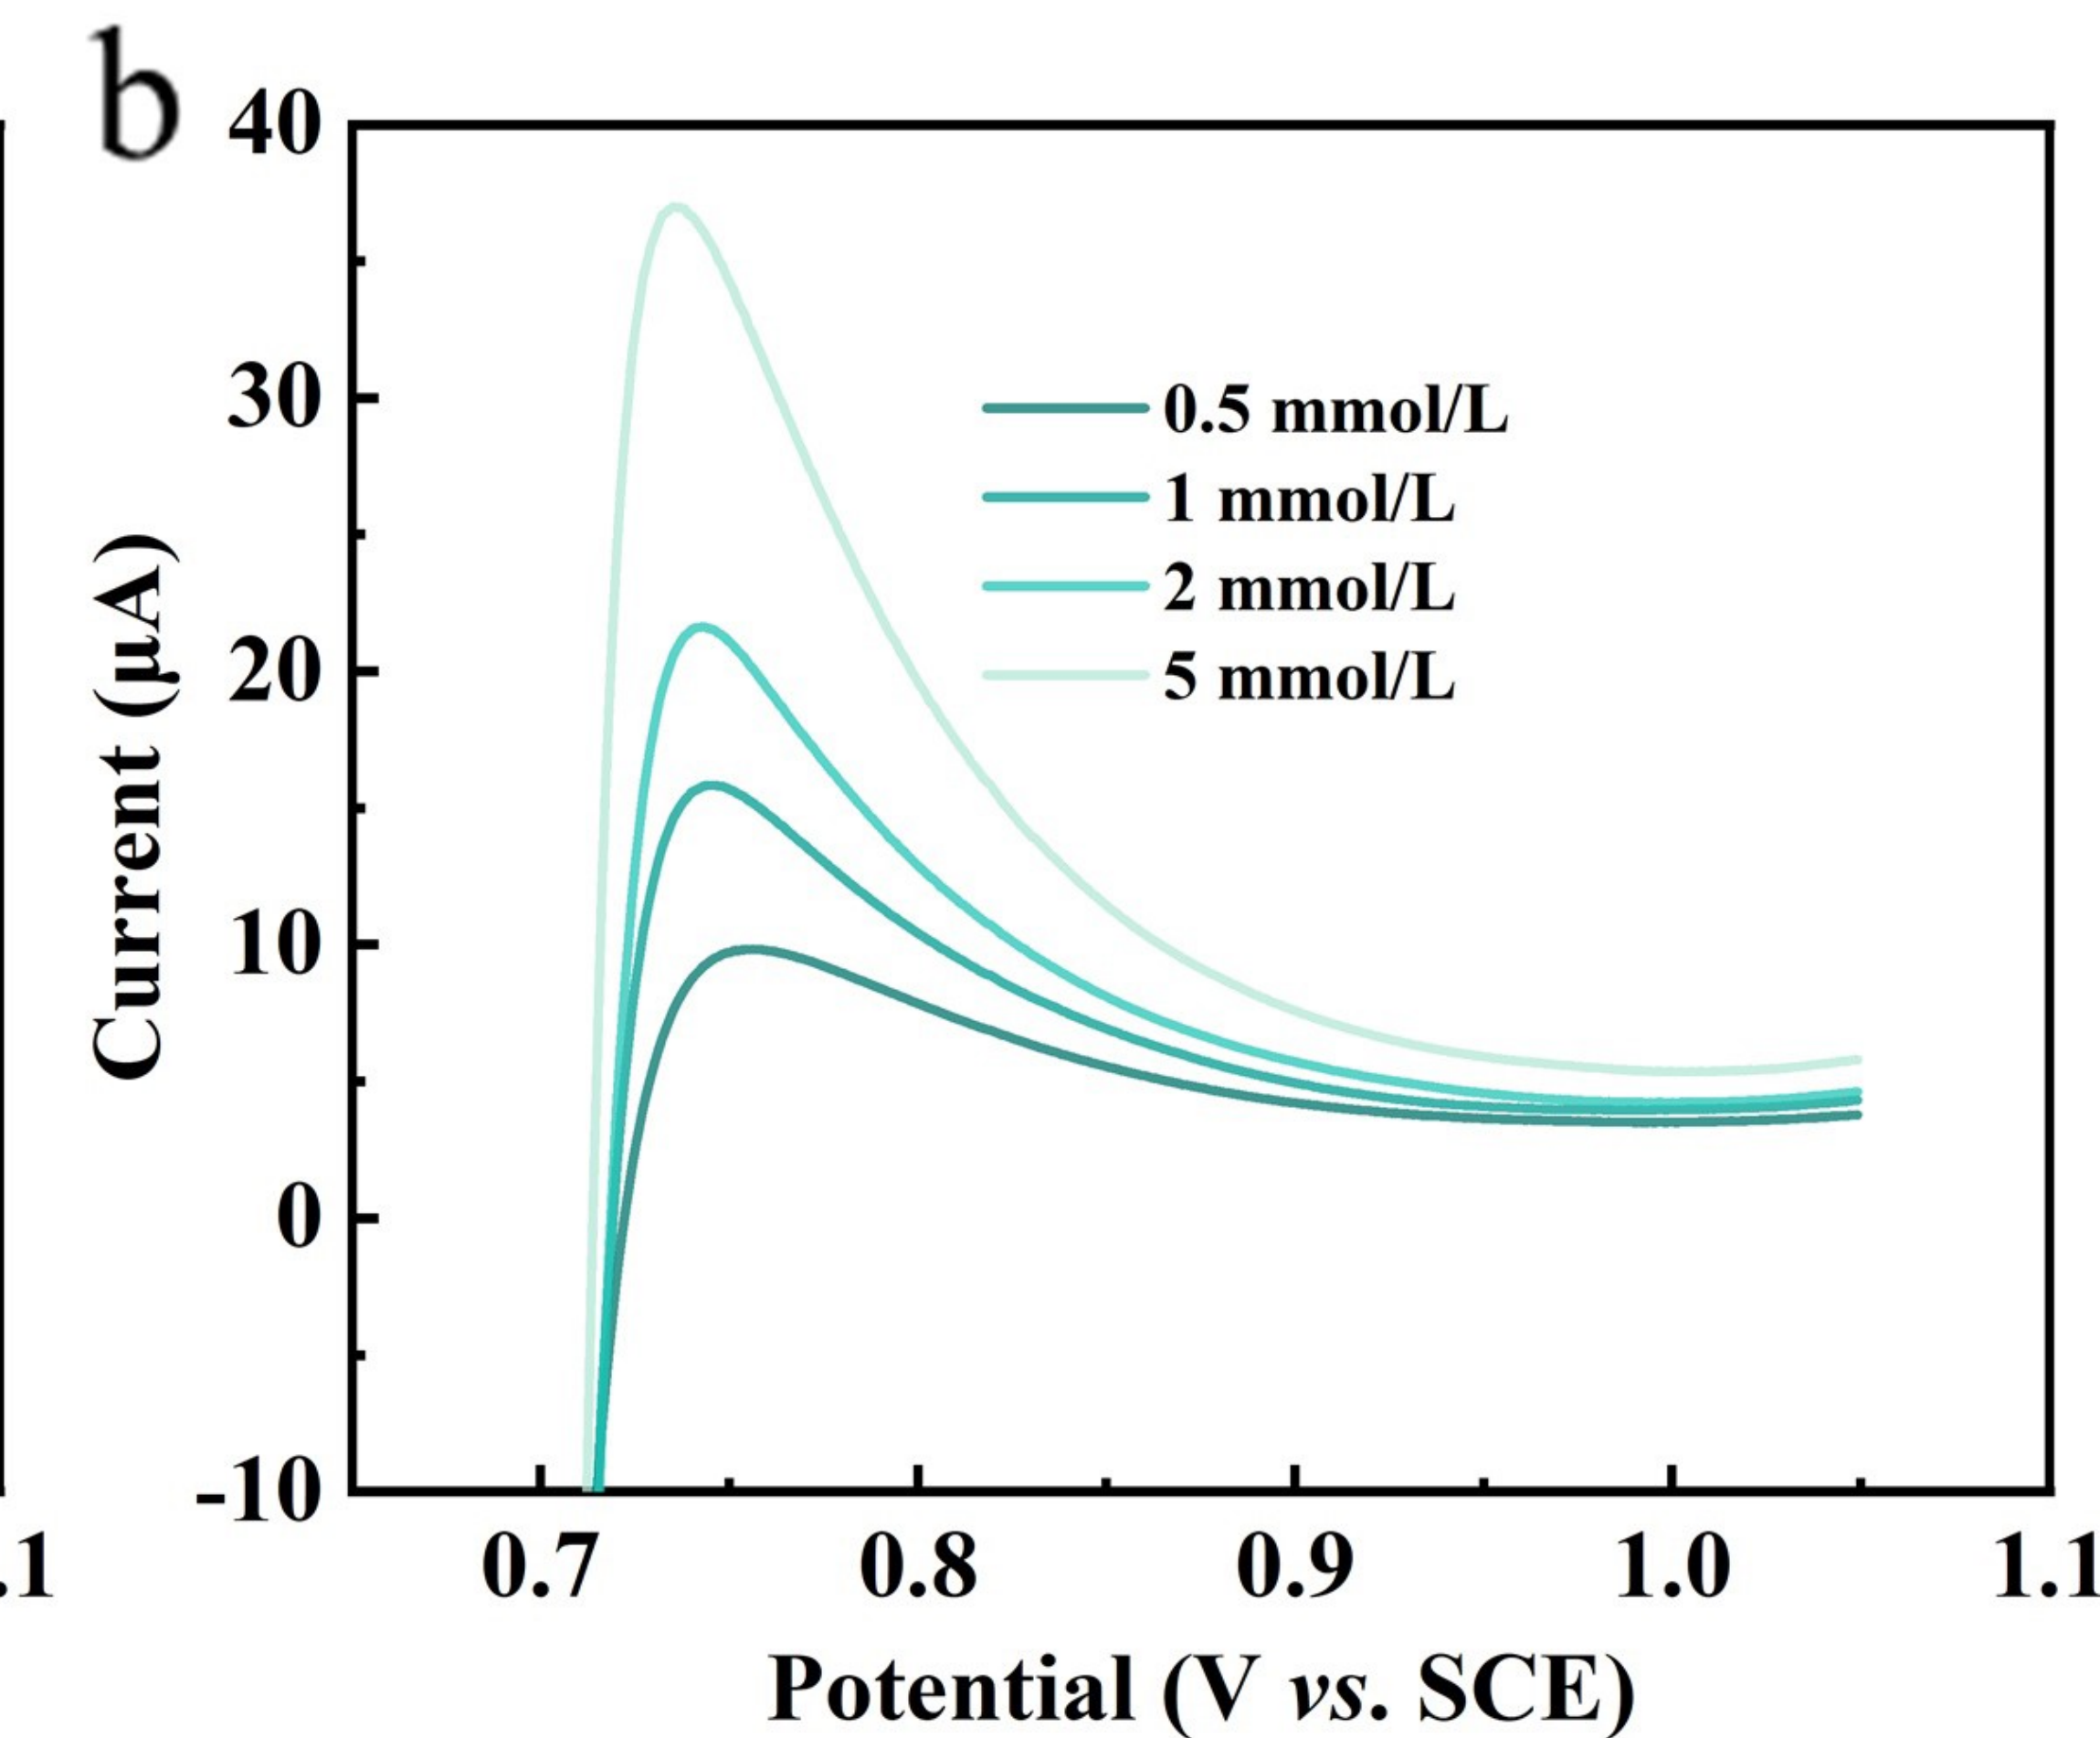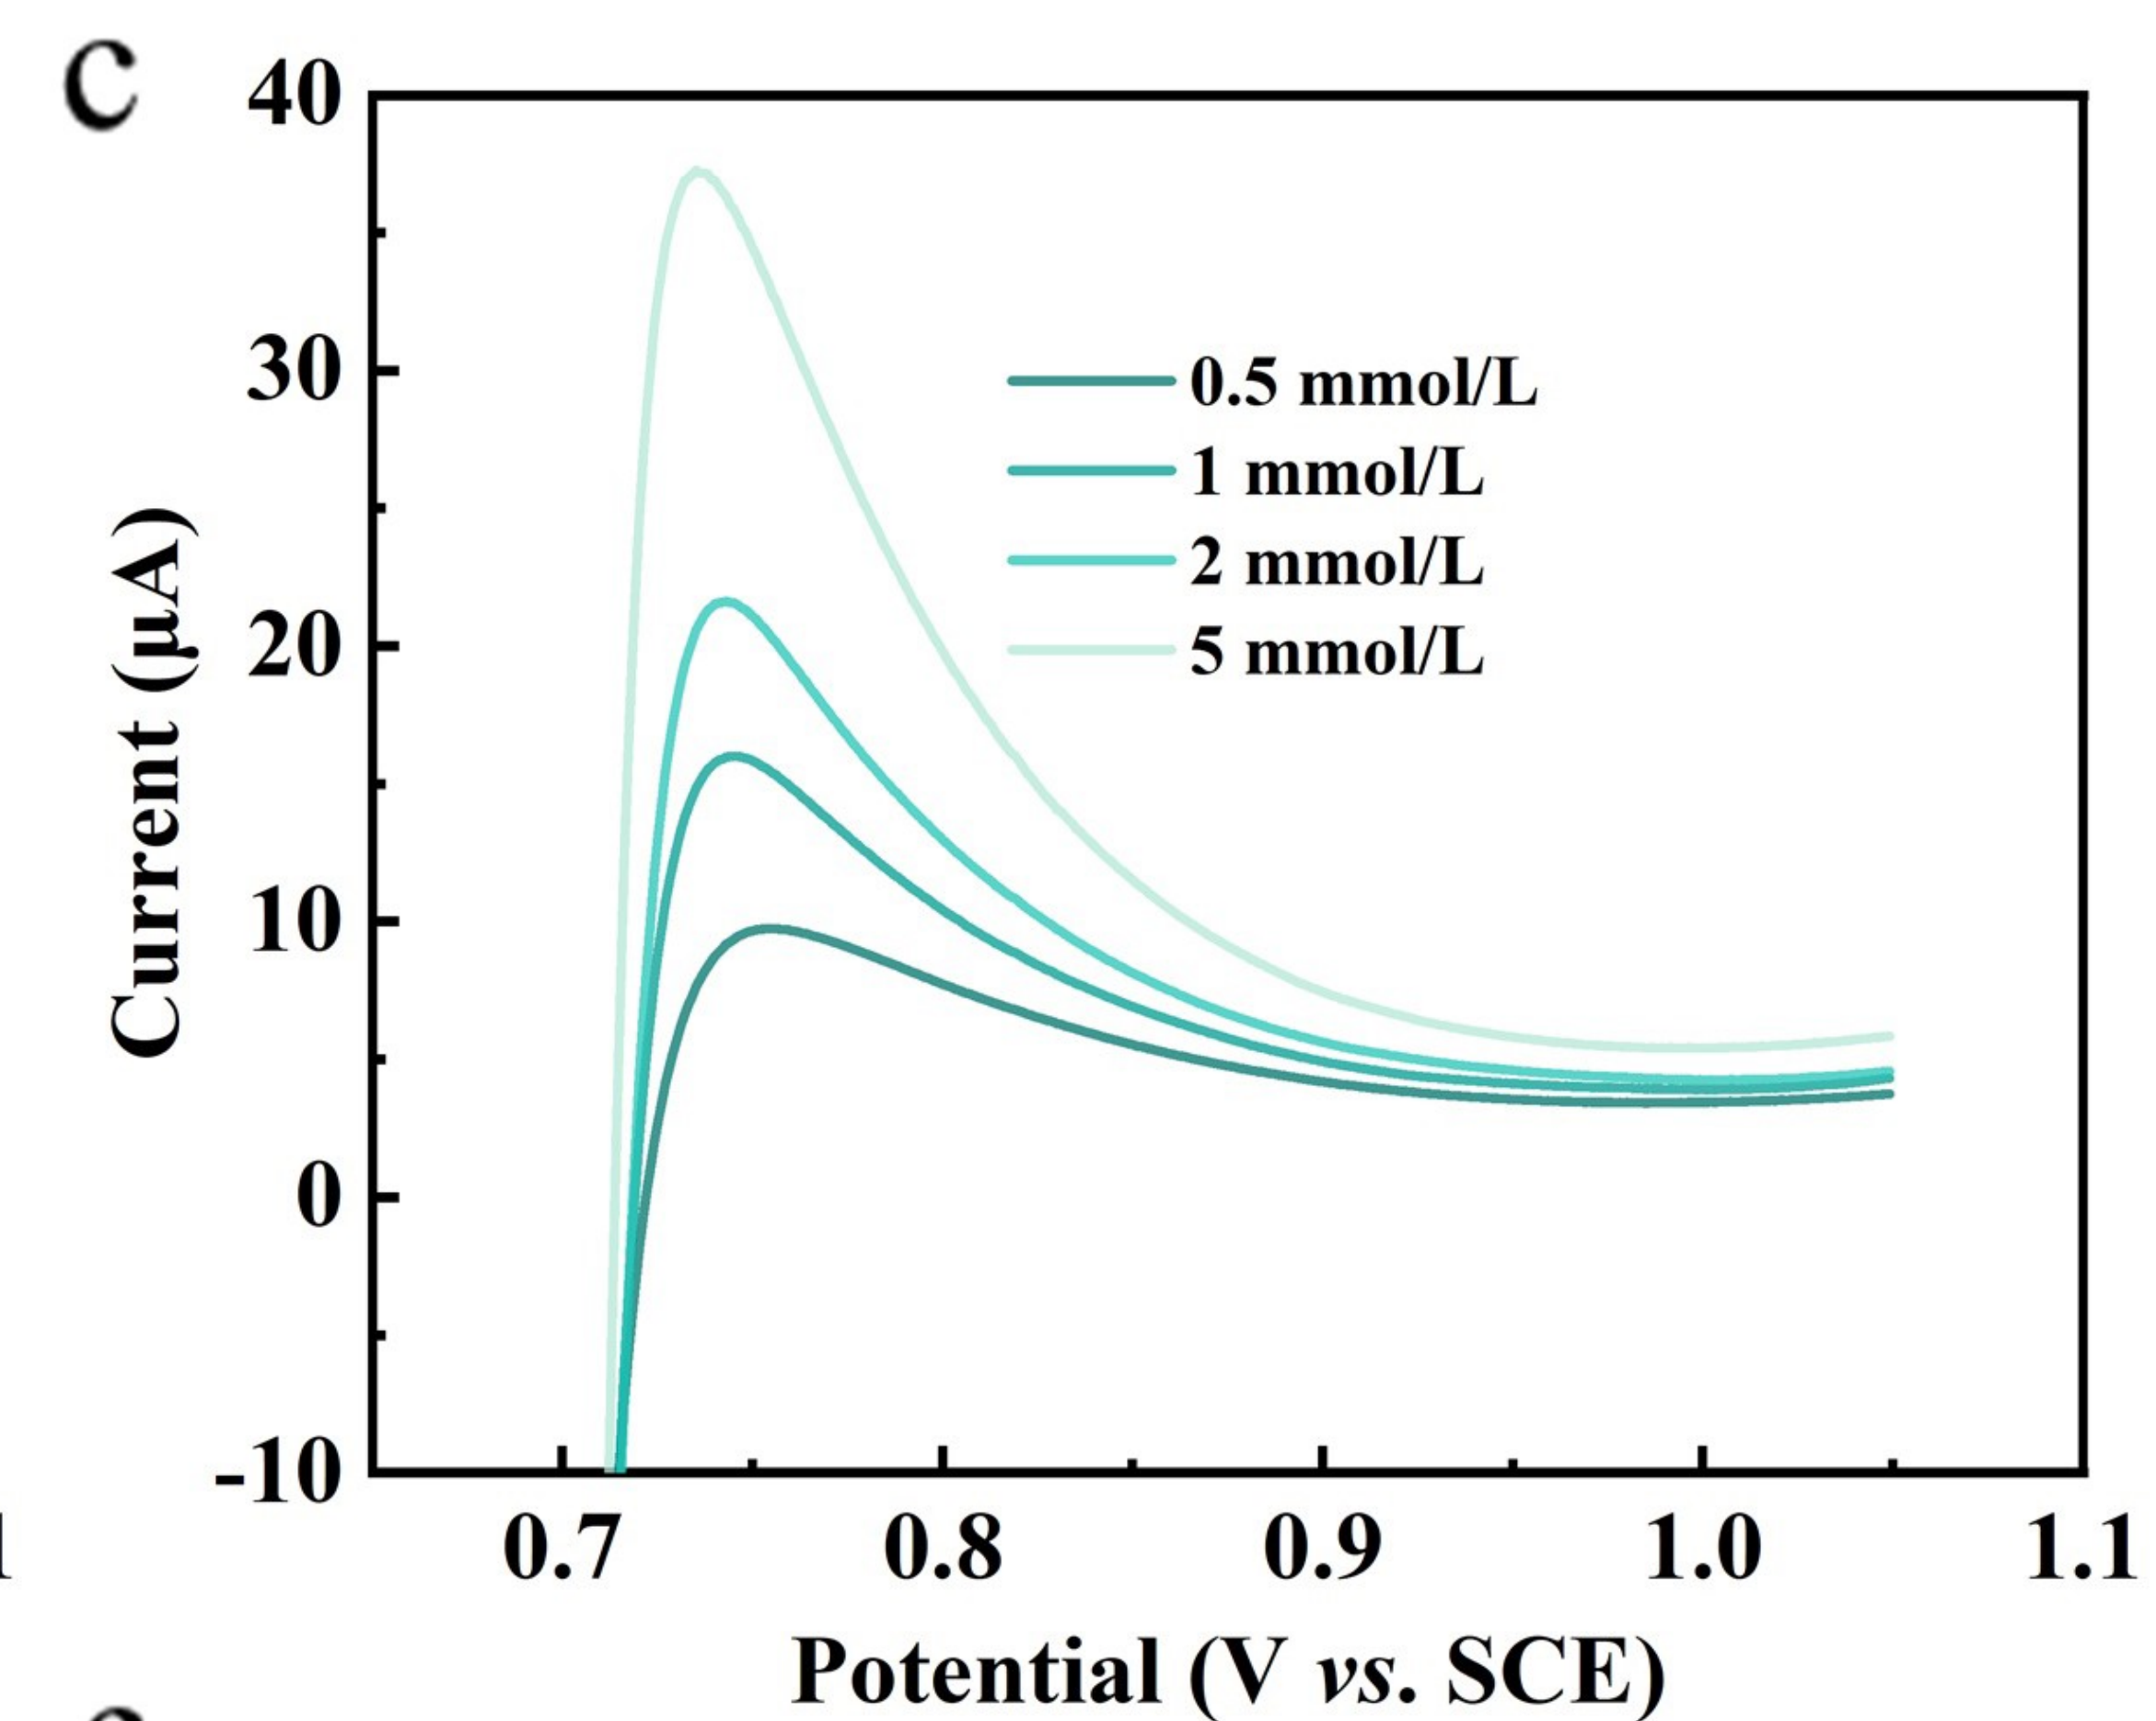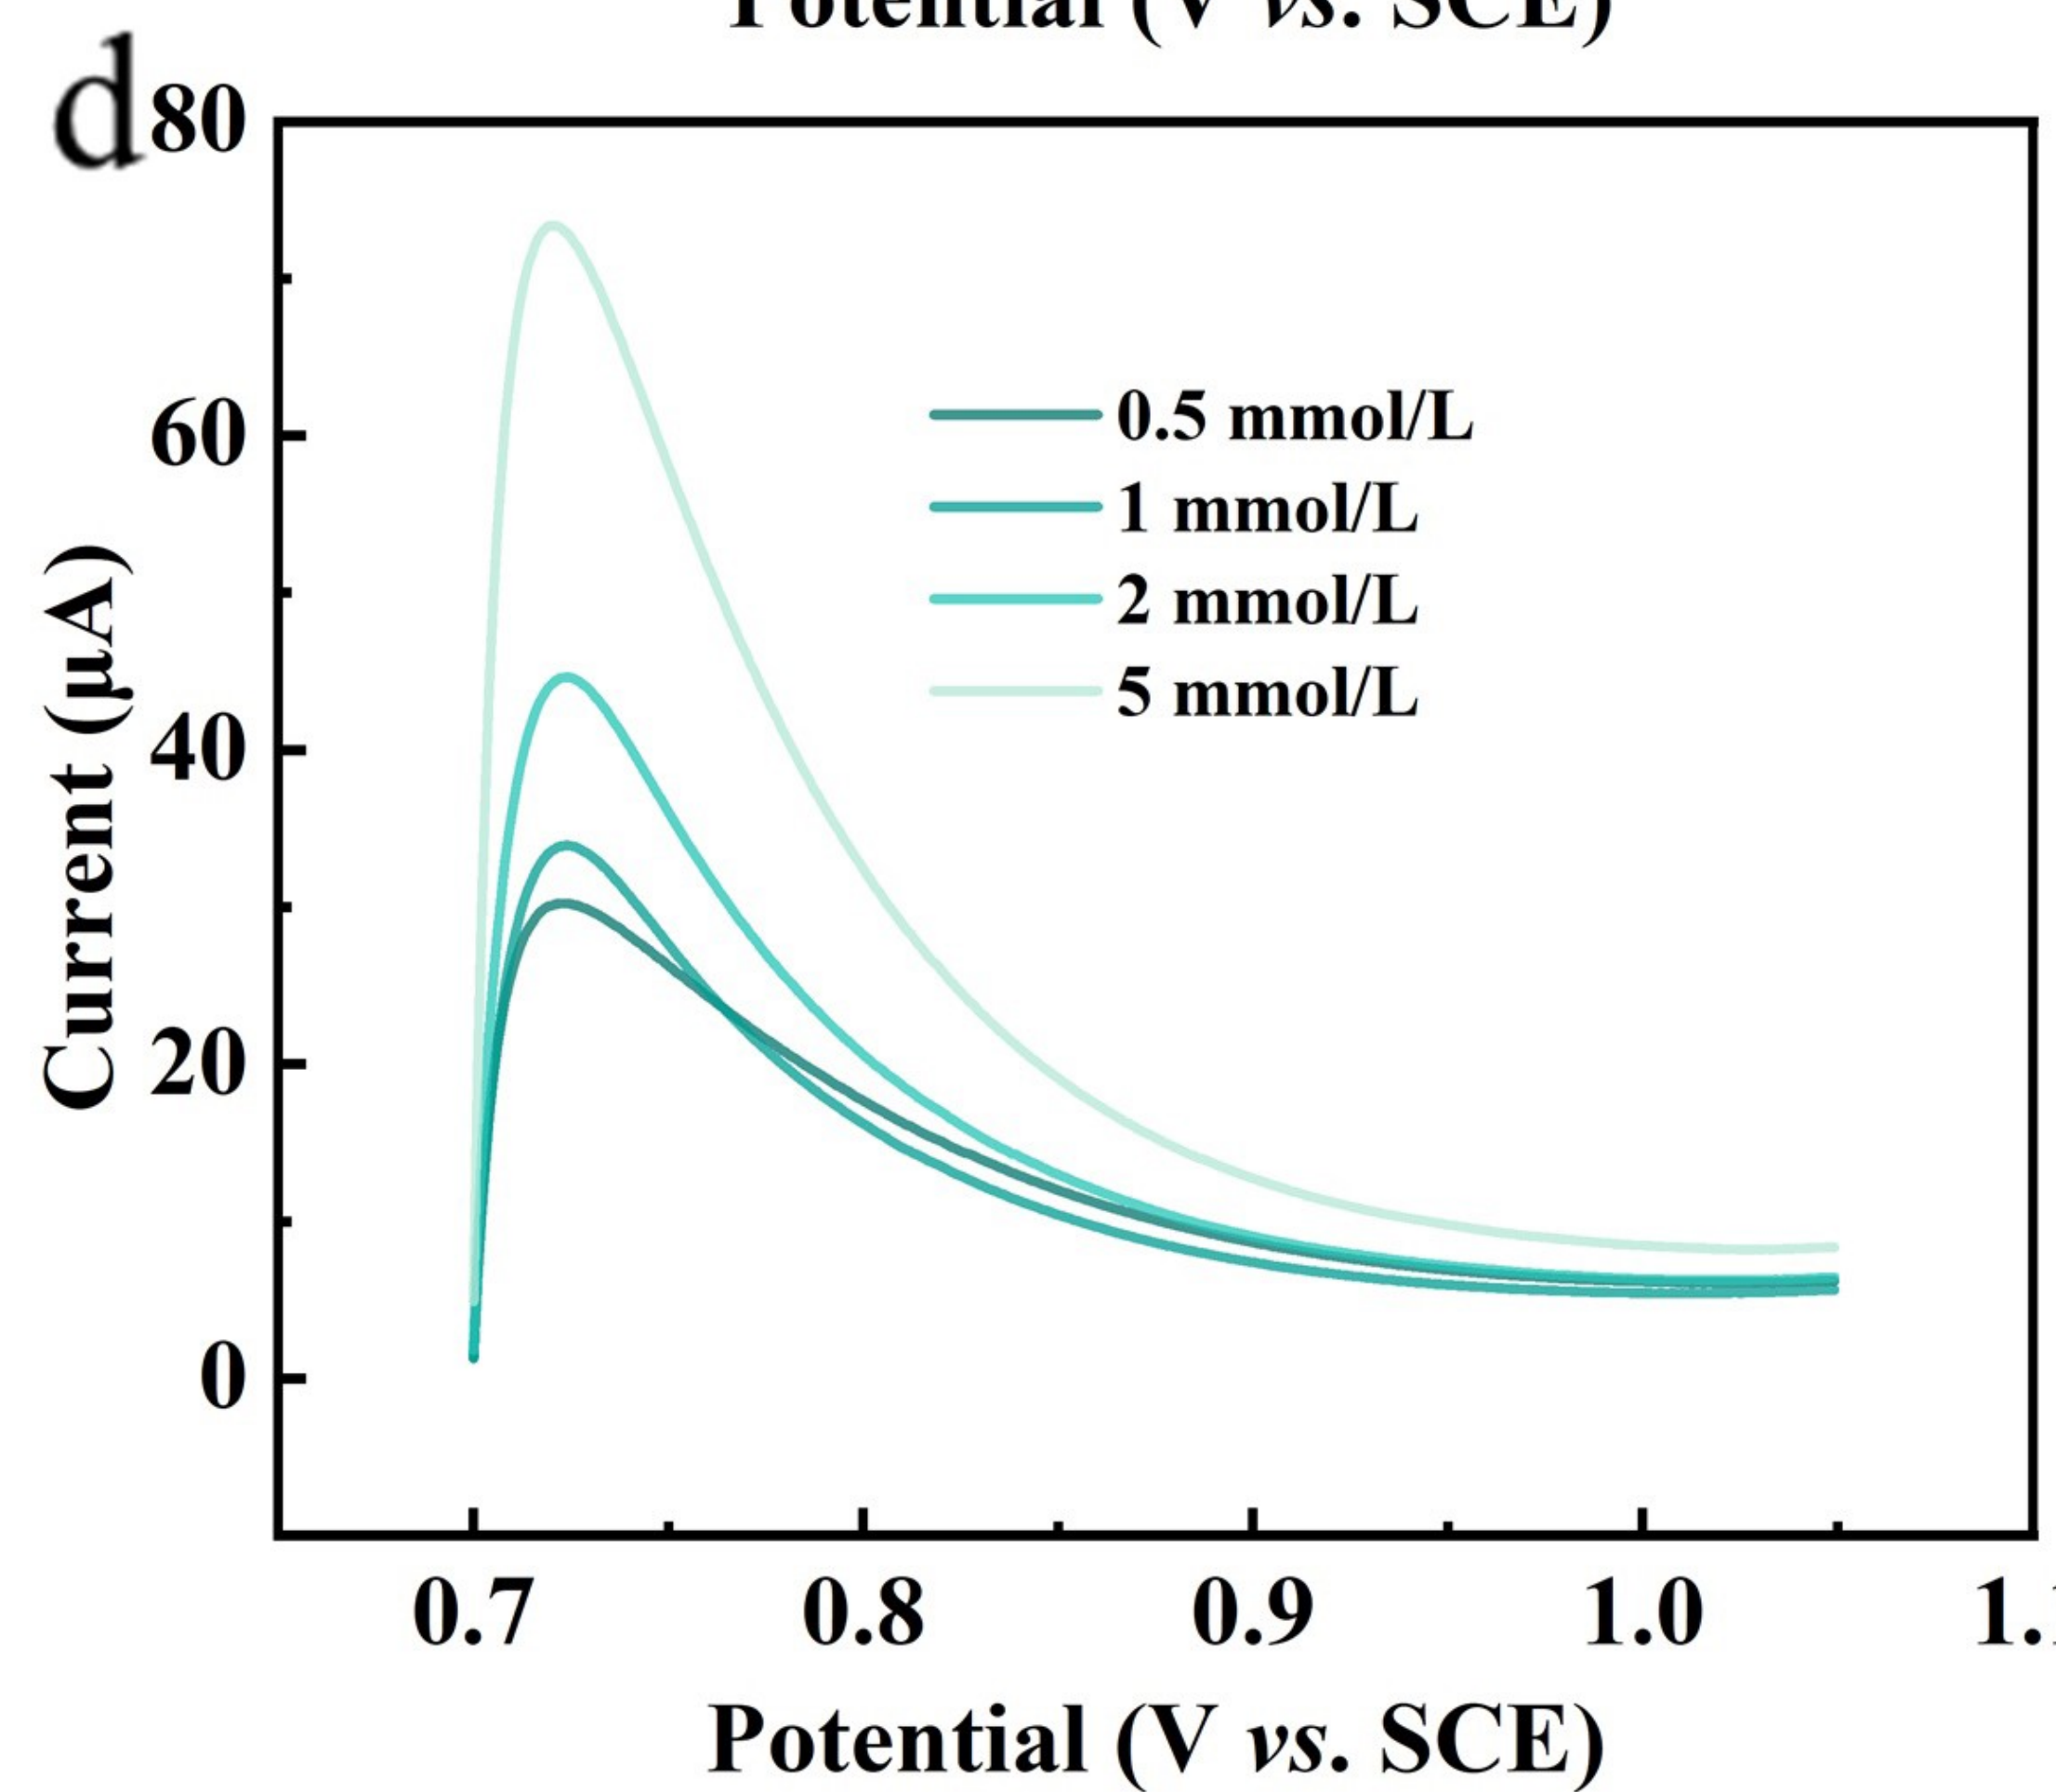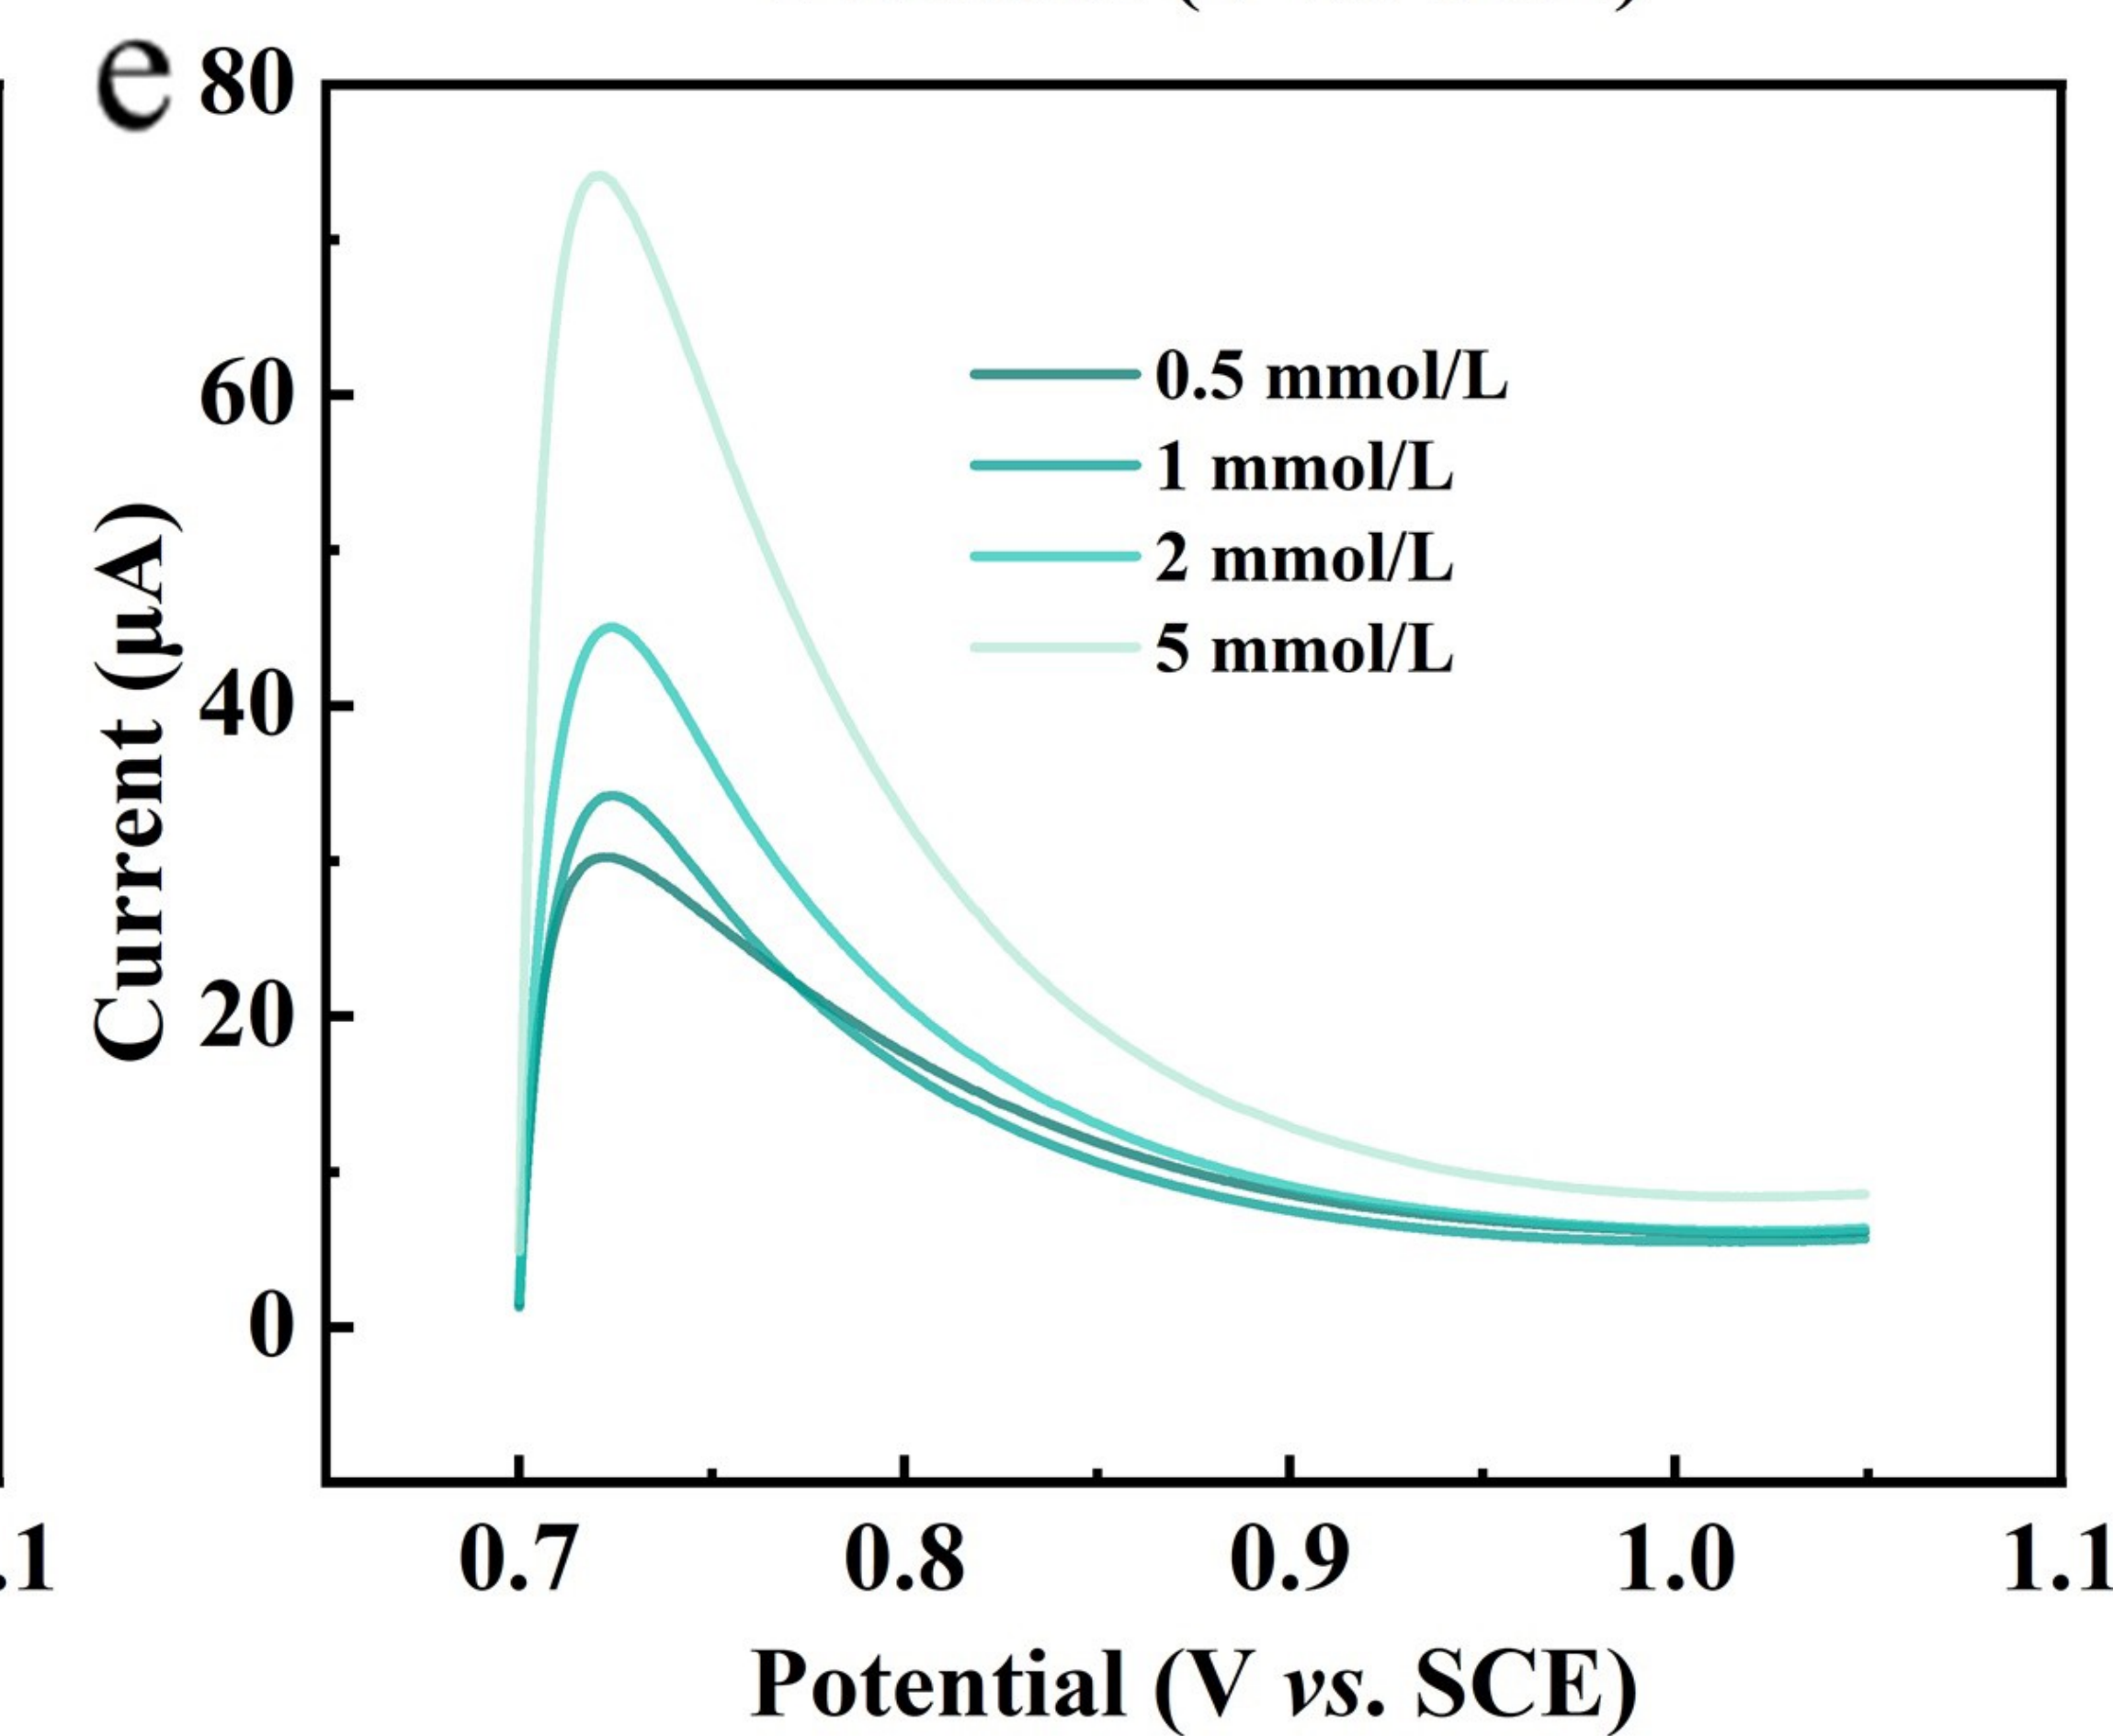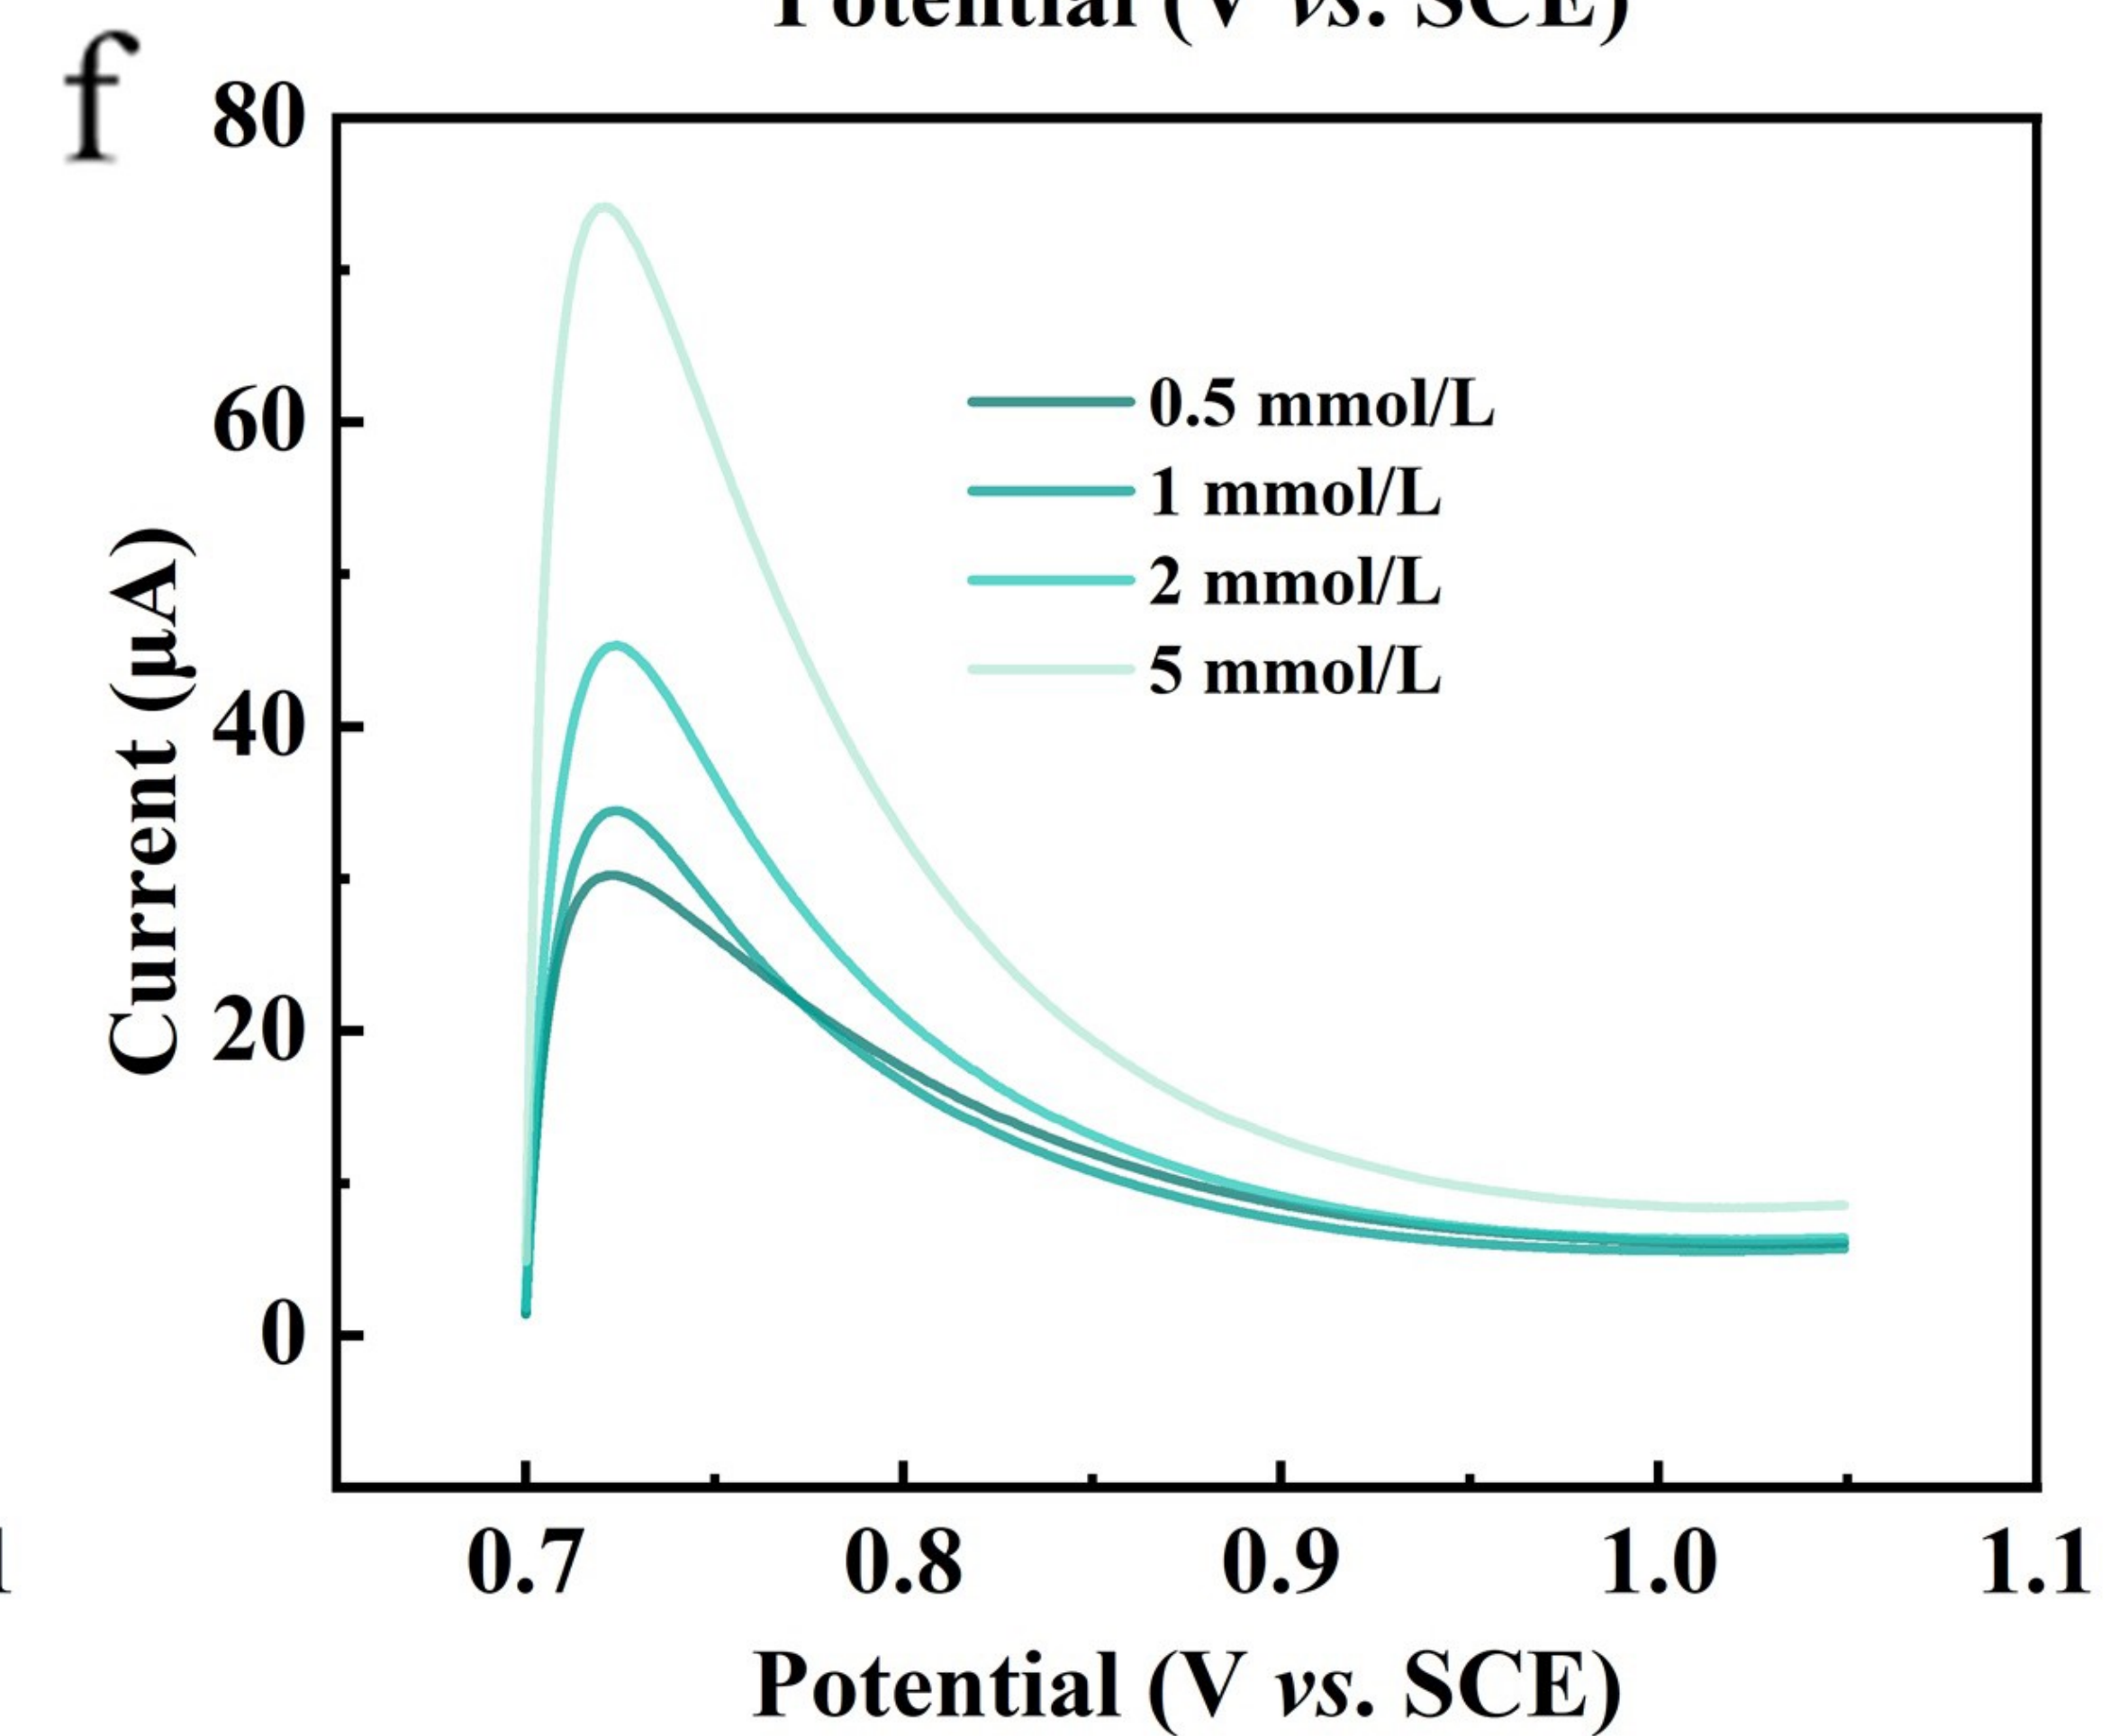

Supplement: d4an00469h6.pdf [file d4an00469h6.pdf]
